# Supplementary material
Source: PubMed Central journal article supplement (PMC8394905)
Supplement: bloodBLD2020005831-suppl1.pdf [file bloodBLD2020005831-suppl1.pdf]

## Supplementary Methods

### *Sanger sequencing*

Genomic DNA was used as input for PCR amplification with MyTaq HS Red (Bioline). Amplicons were then treated with ExoSAP-IT Express (Thermo Fisher) and submitted for sequencing (Eurofins USA). The naming convention for each primer is the sample ID, followed by the mutation that is targeted by the amplicon. We used the reverse PCR primer as sequencing primer for 1909, and the forward PCR primer for all others.

### PCR Conditions

| <u>Temperature</u> | <u>Time</u> | <u>Stage</u>           |
|--------------------|-------------|------------------------|
| 98                 | 3 minutes   | denature               |
| 94                 | 20 seconds  | amplification<br>(x36) |
| 60                 | 15 seconds  |                        |
| 72                 | 30 seconds  |                        |
| 72                 | 1 minute    | extension              |
| 4                  | infinity    | hold                   |

### Primer list (5'-3')

|                |                                |
|----------------|--------------------------------|
| 1506_1916DEL_F | GTCAGACAGCGAGCAGAGCTTT         |
| 1506_1916DEL_R | AAGTGGGCTCTGAAGTTTCATGT        |
| 1511_1106FS_F  | GGGCCAGTCACAGTTTTGACTA         |
| 1511_1106FS_R  | CTTTACAAATTGCTGCCAGACTCA       |
| 1511_splice_F  | TTTGCTCTATTTTGTGTCATTCCATTTTGT |
| 1511_splice_R  | GCAGTGTGAGAACAGACTCAACAG       |
| 1644_1342FS_F  | TGCAAAATATCTGCATGCAGTTAGAAAATC |
| 1644_1342FS_R  | CAAGTAAGTTGTTACAATTGCTGCCAA    |
| 1644_719FS_F   | CCAAGGTACAGTGGACCAACAT         |
| 1644_719FS_R   | AGGGAGATGTGAACTCTGGGAT         |
| 1870_1872ARG_F | CTTACACAAATTAAGTGATGCTAATGGTCA |
| 1870_1872ARG_R | ACATAGTCTGGGCCATACTTTTCAC      |
| 1909_1633TER_F | ACCCTGGGCTTTTGAATCAGAAT        |
| 1909_1633TER_R | CATGAAGTGGCCATCCATCTCA         |
| 1967_1013FS_F  | CTCTTACAGAAGCAAGAACAGCAGCAAAC  |
| 1967_1013FS_R  | GGTGTGGCTATCAAGTTCTGCA         |
| 1967_1268TER_F | GCTGCAAGTGACCCTTGTGTTTTG       |
| 1967_1268TER_R | TGTAAAAGTGACGCTGAACTCT         |

## *Reduced Representation Bisulfite Sequencing*

RRBS samples were prepared using 100 nanograms of DNA extracted from each WGS NK-LGL sample and normal NK cell controls enriched by negative selection (Miltenyi Biotec). RRBS libraries were prepared from extracted DNA (AnaPrep, BioChain Institute) according to the directions of the Ovation RRBS kit (NuGEN). Libraries were quantified with a droplet digital PCR assay from Illumina on the QX200 instrument (Bio-Rad). RRBS libraries were pooled and sequenced using a single 80 base pair reads approach on a NextSeq 500 (Illumina). RRBS data was aligned using Bismark.<sup>1</sup> An average coverage for RRBS regions of 17-25X was achieved. After removing SNP-enriched sites, outliers, sites on sex chromosomes, and sites with low coverage, 2,646,527 sites were retained for analysis. Only CpG locations that were covered to a depth of at least ten reads in each sample were retained for analysis.

High variance CpGs were determined by implementing inter quartile range (IQR) for each cytosine (CpG) across all the samples and calculated using the “iqr” function in R(version 3.6.3). CpGs in the 90th percentile of all the IQRs are annotated as “highvariance CpGs.” Principal component analysis on the highvariance CpGs was performed using the “prcomp” function in R. The scores were determined for principal component 1 (PC1) and principal component 2 (PC2). Highvariance CpGs were annotated to the promoter regions of genes annotated in the hg19 assembly (Genocode v19) . The promoter region for a given gene was defined as transcription start site (TSS) +/- 500 bp. The % CpG methylation of CpGs in the promoter regions were visualized using the “heatmap” function in the “Complex Heatmap” package in R.

Differentially methylated cytosines between *TET2* mutant or WT NK-LGL samples and normal controls were identified using the MethyKit (v1.10.0) package.<sup>2</sup> The following parameters were used to run methylkit: assembly = “hg19” , context = CpG , min.per.group = 2, lo.count = 10, lo.perc = NULL, hi.count = 500, hi.perc = NULL. The other parameters were kept at default values. CpGs with an absolute methylation difference of at least 20% at a statistical significance (q-value) less than 0.05 were denoted as differentially methylated sites (DMCs).

Differentially methylated regions between *TET2* mutant or WT NK-LGL samples and normals was identified using the Edmr (v 0.6.4.1) package.<sup>3</sup> The input for the edmr package is the “myDiff” object generated from the methylkit tool. The following parameters were used to calculate the background regions and differentially methylated regions: Background regions: DMC.qvalue = 1, DMC.methdiff = 0, num.DMCs = 0, num.CpGs = 3, DMR.methdiff = 0, mode = 2, ACF = T, fuzzypval = 1. Differentially methylated regions ( DMRs ): DMC.qvalue = 0.01, DMC.methdiff = 25, num.DMCs = 3, plot = FALSE, mode = 2, ACF = TRUE. Further, differentially methylated regions were filtered for an absolute methylation difference of greater than 25 at a statistical significance (qvalue) less than 0.05 are annotated as differentially methylated regions.

Pathway Analysis of DMRs using GREAT: differentially methylated regions unique to *TET2* mutant when compared to WT were annotated as “hyper DMRs” and “hypo DMRs” based on positive or negative change in the methylation, respectively. These unique regions were used to identify enriched pathways using GREAT<sup>4</sup> with the following parameters: Basal plus extension, Proximal 5kb upstream, 1kb downstream plus distal up to 1000 kb. Pathways enriched at a q-value of less than 0.05 were used to understand the regulatory mechanisms associated with DNA methylation changes.

Visualization plots in Figure 4 and Supplemental Figure 6 were generated with Methylation plotter.<sup>5</sup>

### *Methylation-specific PCR*

Genomic DNA was isolated using an Anaprep DNA Extraction Kit (Biochain) and bisulfite converted using an EZ DNA Methylation-Gold Kit (Zymo) according to the manufacturer's protocol. A universal methylated human DNA standard (Zymo) was used as a positive control. The methylation status was determined by PCR as previously described for *TET2*<sup>6</sup> and *PTPRD*.<sup>7</sup> The PCR mixture contained 12.5 uL of MyTaq HS Red Mix (Meridian Bioscience), 1 uL of purified bisulfite-converted DNA, 2.5 uL ddH<sub>2</sub>O, and 2 uL of each of the forward and reverse primers (5 uM) to a final reaction volume of 20 uL. The cycling parameters were an initial denaturation step of 95°C for 10 min; 39 cycles of denaturation at 95°C for 30 s, annealing for 30 s (62°C for *TET2*; 63°C for *PTPRD*), and extension at 72°C for 60 s, with a final extension step at 72°C for 7 min. PCR products were analyzed by agarose gel electrophoresis with imaging and quantification using BioRad Image Lab software. Methylated bands were scored as yes in the *TET2* assay if they were >average+1.45 standard deviations of the normal NK sample methylated band. Methylated bands were scored as yes in the *PTPRD* assay if they were >average+2 standard deviations of the normal NK sample methylated band.

## Supplemental Table 1

Patients are listed in order of ID number in panels A, B, and C, with mutation status included in each panel. Panel D presents the patients by mutation group. **A** includes demographics and CBC data. CBC parameters for each patient were retrieved as close as possible to the sequencing date, when mutations were assessed. Of the 58, n=43 had an exact date match, n=8 were <6 months from sequencing, n=4 were <12 months from sequencing, and n=3 were >12 months from sequencing. **B** provides information about treatment status, treatments attempted, diagnosis to sequencing sample, time to treatment, survival to 60 months, concomitant disorders, and other data. Treatment status for both sequencing sample and CBC sample match, regardless of the 15 patients who do not have matching CBC sample dates. **C** provides peripheral blood flow cytometry data for relevant NK cell markers and bone marrow results, if available. **D** shows data for immunosuppressive treatment and response. Patients who received treatment for LGL leukemia, not a concomitant disorder, are listed in this table. Patients are marked according to response; non-evaluable indicates the patient took treatment for LGL leukemia symptoms other than cytopenias.

# Supplemental Table 1A: Patient Mutation, Demographics, and CBC Data

MPV = mean platelet volume, RBC = red blood cell count, HCT = hematocrit, HGB = hemoglobin, WBC = white blood cell, MCV = mean corpuscular volume, RDW = red blood cell distribution width,

ANC = absolute neutrophil count, ALC = absolute lymphocyte count, \* = mutation validated in CD94+/CD94- Sanger, 90+ = patient > 90 years of age, # = 1870 CBC values excluded from statistics (genetic  $\beta$  thalassemia)

| Patient ID | Mutations in STAT3, TET2, TNFAIP3, PI3KCD, PIK3AP1                                                         | Sex | Age | WBC (k/ $\mu$ L) | ALC (k/ $\mu$ L) | ANC (k/ $\mu$ L) | RBC (10 <sup>6</sup> / $\mu$ L) | HGB (g/dL) | HCT (%) | RDW (%) | MCV (fL) | MPV (fL) | Platelets (k/ $\mu$ L) |
|------------|------------------------------------------------------------------------------------------------------------|-----|-----|------------------|------------------|------------------|---------------------------------|------------|---------|---------|----------|----------|------------------------|
| 1001       | STAT3 D661Y (38%)<br>TET2 G1184D (9%)<br>TET2 Q1445L (5%)                                                  | M   | 76  | 9.5              | 4.8              | 1.5              | 3.4                             | 11.0       | 32.1    |         | 93.3     |          | 396.0                  |
| 1002       |                                                                                                            | F   | 53  | 7.3              | 5.0              | 1.9              | 4.4                             | 11.8       | 35.9    | 18.0    | 82.0     | 7.0      | 208.0                  |
| 1059       |                                                                                                            | M   | 74  | 10.3             | 4.4              | 4.7              | 4.6                             | 14.6       | 43.7    | 13.5    | 94.8     |          | 207.0                  |
| 1061       | STAT3 S614R (13%)                                                                                          | M   | 79  | 6.3              | 3.0              | 2.4              | 3.7                             | 12.6       | 37.4    | 14.4    | 101.6    | 7.6      | 257.0                  |
| 1086       |                                                                                                            | F   | 69  | 14.1             | 1.5              | 12.1             | 4.2                             | 12.8       | 37.9    | 13.3    | 90.2     |          | 321.0                  |
| 1092       |                                                                                                            | F   | 46  | 14.6             | 10.1             | 3.2              | 4.3                             | 12.8       | 40.1    | 13.1    | 94.4     | 9.5      | 217.0                  |
| 1104       | STAT3 Y640F (47%)                                                                                          | M   | 83  | 11.1             | 8.1              | 2.7              | 4.0                             | 12.3       | 35.6    | 14.8    | 89.0     |          | 130.0                  |
| 1133       |                                                                                                            | M   | 75  | 18.5             | 15.3             | 2.4              |                                 | 14.9       | 44.7    |         |          |          | 331.0                  |
| 1139       |                                                                                                            | F   | 56  | 10.5             | 8.7              | 0.5              | 3.8                             | 12.4       | 37.0    | 15.5    | 98.7     | 10.9     | 331.0                  |
| 1140       |                                                                                                            | F   | 54  | 16.6             | 13.3             | 3.2              | 4.3                             | 13.5       | 39.2    | 13.8    | 91.6     | 6.8      | 329.0                  |
| 1166       | TET2 T1251fs (43%)                                                                                         | M   | 40  | 11.9             | 3.5              | 6.7              | 5.7                             | 15.5       | 44.5    |         | 77.5     |          | 136.0                  |
| 1257       | STAT3 E286del (23%)<br>TET2 G1860E (25%)<br>PIK3CD E1021K (23%)                                            | M   | 79  | 8.8              | 5.9              | 2.0              | 4.5                             | 13.1       | 39.2    | 14.6    | 86.9     | 8.7      | 196.0                  |
| 1289       | STAT3 D661Y (42%)                                                                                          | M   | 74  | 6.0              | 4.5              | 1.0              | 2.5                             | 9.5        | 28.0    | 21.6    | 113.8    | 10.2     | 181.0                  |
| 1340       | STAT3 I659L (4%)                                                                                           | F   | 59  | 2.0              | 0.6              | 1.2              | 4.1                             | 12.3       | 37.3    | 16.3    | 91.0     |          | 9.0                    |
| 1362       | TNFAIP3 Y443fs (7%)                                                                                        | M   | 38  | 21.4             | 14.6             | 6.0              | 5.3                             | 15.9       | 45.8    | 13.4    | 86.7     | 9.4      | 241.0                  |
| 1376       |                                                                                                            | M   | 50  | 15.8             | 9.4              | 4.5              | 5.2                             | 15.6       | 46.1    | 16.4    | 88.8     | 8.1      | 444.0                  |
| 1429       | TET2 R1134fs (33%)<br>TET2 R550Ter (40%)                                                                   | M   | 80  | 34.1             | 4.1              | 16.4             | 4.0                             | 14.2       | 42.2    | 14.1    | 105.8    | 11.6     | 122.0                  |
| 1444       | STAT3 D661I (39%)<br>TET2 Q1523ter (41%)<br>TET2 F1104fs (42%)<br>TET2 Q897fs (5%)<br>TNFAIP3 N340fs (37%) | M   | 77  | 9.0              | 4.1              | 3.1              | 3.9                             | 12.7       | 38.2    | 15.7    | 97.4     | 11.2     | 123.0                  |
| 1483       | STAT3 G618R (30%)                                                                                          | M   | 63  | 4.3              | 1.9              | 1.8              | 3.7                             | 11.4       | 32.9    | 23.4    | 89.6     | 8.9      | 239.0                  |
| 1489       | STAT3 G618R (32%)                                                                                          | M   | 48  | 6.8              | 5.5              | 0.8              | 3.5                             | 11.7       | 32.8    | 17.4    | 93.2     | 9.1      | 332.0                  |
| 1498       |                                                                                                            | M   | 65  | 13.9             | 2.4              | 10.8             | 4.7                             | 15.3       | 44.9    | 14.0    | 95.3     | 11.5     | 224.0                  |
| 1506       | TET2 L1916del (29%)*<br>TNFAIP3 Q241fs (5%)                                                                | F   | 63  | 12.6             | 8.3              | 3.5              | 4.6                             | 13.1       | 38.4    | 12.8    | 84.4     | 11.2     | 229.0                  |
| 1507       | STAT3 D661Y (32%)<br>TET2 Q764fs (33%)                                                                     | M   | 62  | 10.7             | 7.2              | 2.2              | 3.8                             | 12.3       | 38.0    | 18.7    | 99.7     | 10.4     | 478.0                  |
| 1511       | STAT3 N647I (48%)<br>TET2 E1106fs (11%)*<br>TET2 splice (15%)*                                             | M   | 77  | 6.2              | 4.4              | 0.8              | 3.6                             | 11.4       | 33.8    | 17.5    | 94.7     | 5.3      | 218.0                  |
| 1528       |                                                                                                            | M   | 40  | 5.4              | 3.2              | 1.6              |                                 | 12.2       | 34.4    |         |          |          | 61.0                   |
| 1556       |                                                                                                            | F   | 68  | 4.7              | 1.5              | 2.7              | 3.6                             | 12.0       | 34.9    | 13.5    | 98.0     | 9.0      | 171.0                  |
| 1573       |                                                                                                            | F   | 74  | 10.8             | 1.7              | 8.3              | 2.3                             | 8.2        | 24.4    | 25.9    | 104.3    | 9.6      | 550.0                  |
| 1586       |                                                                                                            | F   | 77  | 9.4              | 7.5              | 1.3              | 4.7                             | 14.5       | 41.2    | 13.6    | 88.0     | 10.2     | 252.0                  |
| 1591       | TNFAIP3 S266fs (10%)                                                                                       | F   | 34  | 6.5              | 3.3              | 2.4              | 4.6                             | 13.2       | 38.4    | 10.2    | 84.4     | 6.7      | 238.0                  |
| 1612       | TET2 C1271fs (28%)                                                                                         | F   | 68  | 7.2              | 6.0              | 0.8              | 3.0                             | 10.1       | 30.0    | 21.8    | 100.0    |          | 87.0                   |
| 1644       | TET2 L719fs (28%)*<br>TET2 P1342fs (28%)*                                                                  | M   | 66  | 3.5              | 2.1              | 0.70             | 3.3                             | 11.2       | 34.0    | 15.5    | 102.0    | 8.9      | 74.0                   |
| 1724       |                                                                                                            | M   | 53  | 7.2              | 3.7              | 2.4              | 4.0                             | 13.7       | 39.2    | 14.3    | 97.8     | 9.8      | 191.0                  |
| 1760       | STAT3 D661V (37%)                                                                                          | M   | 62  | 10.0             | 6.8              | 2.3              | 4.6                             | 13.7       | 40.2    | 14.7    | 87.4     | 10.1     | 228.0                  |
| 1768       |                                                                                                            | M   | 63  | 6.1              | 2.7              | 2.8              | 5.1                             | 15.2       | 44.0    | 13.2    | 85.8     | 9.6      | 180.0                  |
| 1791       | STAT3 K658R (43%)                                                                                          | F   | 58  | 24.9             | 19.9             | 3.7              | 2.8                             | 10.1       | 30.9    | 18.8    | 109.2    | 9.4      | 681.0                  |
| 1794       | STAT3 D661Y (34%)                                                                                          | M   | 90+ | 10.5             | 6.4              | 3.7              | 3.5                             | 9.3        | 27.8    | 19.7    | 80.6     | 10.0     | 195.0                  |
| 1818       | STAT3 N647I (14%)                                                                                          | M   | 75  | 4.4              | 2.2              | 1.6              | 3.9                             | 12.8       | 37.0    | 15.6    | 94.6     |          | 172.0                  |
| 1820       | TET2 R1452ter (22%)<br>PIK3CD E81K (13%)                                                                   | M   | 68  | 9.2              | 3.0              | 5.4              | 4.6                             | 13.1       | 38.0    | 12.4    | 84.0     | 11.8     | 141.0                  |
| 1823       |                                                                                                            | M   | 7   | 14.2             | 8.8              | 4.7              | 5.7                             | 13.8       |         | 16.0    | 73.0     |          |                        |
| 1856       | Global CNV                                                                                                 | F   | 51  | 10.3             | 7.4              | 2.4              | 4.6                             | 14.1       | 41.0    | 12.3    | 88.7     | 9.4      | 219.0                  |
| 1862       | TNFAIP3 Q379ter (46%)<br>TNFAIP3 M433fs (44%)                                                              | M   | 62  | 8.1              | 0.4              | 0.6              | 3.6                             | 9.7        | 29.9    | 19.7    | 82.6     |          | 40.0                   |
| 1866       | PIK3AP1 S718N (28%)<br>Global CNV                                                                          | F   | 72  | 5.4              | 3.7              | 1.1              | 3.6                             | 11.8       | 35.1    | 15.3    | 98.3     | 9.5      | 254.0                  |
| 1870#      | TET2 L1872R (12%)                                                                                          | M   | 47  | 3.7              | 2.3              | 1.1              | 3.2                             | 8.6        | 27.6    | 16.7    | 85.7     | 8.8      | 175.0                  |
| 1882       |                                                                                                            | M   | 63  | 3.5              | 2.8              | 0.6              | 2.6                             | 7.2        | 21.8    | 20.7    | 84.2     | 9.0      | 47.0                   |
| 1909       | STAT3 S614R (28%)<br>TET2 C1633ter (29%)*                                                                  | M   | 54  | 4.4              | 2.7              | 1.4              | 2.8                             | 7.9        | 23.9    | 26.2    | 84.2     | 10.3     | 413.0                  |
| 1928       |                                                                                                            | M   | 64  | 2.2              | 0.7              | 1.3              | 4.5                             | 13.2       | 40.5    | 15.7    | 89.2     | 8.6      | 177.0                  |
| 1967       | STAT3 S614R (12%)<br>TET2 E1268ter (43%)*<br>TET2 P1013fs (38%)*                                           | M   | 64  | 8.0              | 6.2              | 1.3              | 3.0                             | 9.2        | 29.3    |         | 98.3     |          | 190.0                  |
| 1978       |                                                                                                            | M   | 34  | 14.6             | 8.7              | 1.5              | 4.3                             | 12.3       | 36.8    | 16.1    | 86.0     |          | 212.0                  |
| 1984       |                                                                                                            | F   | 63  | 6.4              | 4.3              | 1.4              | 4.0                             | 11.9       | 35.1    | 13.3    | 87.5     |          | 182.0                  |
| 2003       | STAT3 Y640F (43%)                                                                                          | M   | 21  | 7.2              | 6.0              | 0.7              | 4.7                             | 12.7       | 38.9    | 16.2    | 83.3     | 9.7      | 125.0                  |
| 2010       | TET2 Q720ter (14%)                                                                                         | F   | 73  | 3.4              | 2.3              | 0.8              | 2.5                             | 8.4        | 26.3    | 19.0    | 105.6    | 9.2      | 165.0                  |
| 2011       |                                                                                                            | M   | 25  | 3.9              | 3.2              | 0.3              | 3.6                             | 10.7       | 33.3    | 20.3    | 93.0     | 8.9      | 178.0                  |
| 2012       | STAT3 D661Y (36%)                                                                                          | M   | 71  | 6.4              | 3.2              | 1.6              | 2.6                             | 9.1        | 26.6    | 16.5    | 101.5    | 9.6      | 223.0                  |
| 2069       | TET2 R814fs (4%)                                                                                           | M   | 83  | 4.9              | 0.9              | 2.9              | 4.0                             | 11.8       | 36.2    | 13.7    | 90.5     | 10.5     | 148.0                  |
| 2079       |                                                                                                            | M   | 65  | 6.3              | 1.1              | 4.3              | 4.5                             | 14.5       | 42.0    | 14.6    | 94.4     | 12.0     | 156.0                  |
| 2099       |                                                                                                            | F   | 78  | 1.8              | 1.2              | 0.5              | 2.7                             | 8.7        | 26.4    | 17.2    | 99.2     | 9.7      | 171.0                  |
| 2104       |                                                                                                            | F   | 75  | 4.0              | 1.3              | 2.1              | 4.5                             | 13.9       | 42.0    | 13.0    | 94.2     | 9.5      | 258.0                  |
| 2112       | TNFAIP3 C200fs (8%)<br>TNFAIP3 V209_S211 delinsA (8%)                                                      | F   | 69  | 8.0              | 3.4              | 4.0              | 4.9                             | 14.5       | 42.1    | 12.8    | 86.4     | 8.8      | 284.0                  |

# Supplemental Table 1B: Patient Mutation, Treatment, Survival, and Misc. Data

MTX = methotrexate, Pred. = prednisone, CP = cyclophosphamide, CsA = Cyclosporine A, transf dep = transfusion dependent, EPO=erythropoietin, Tx=treatment, Dx=diagnosis, mos=months, \* = mutation validated in CD94+/CD94- Sanger

| Patient ID | Sample types       | Sequencing type          | Mutations in STAT3, TET2, TNFAIP3, PIK3CD, PIK3AP1                                                         | Immuno Tx at sequencing? | All Tx Attempted                                       | Diagnosis -- sequencing (mos) | Diagnosis --1st LGLL Tx (mos) | Tx needed by 60 mos post-dx? | Survival to 60 mos? | Concomitant disorders                                                         | Other                         |
|------------|--------------------|--------------------------|------------------------------------------------------------------------------------------------------------|--------------------------|--------------------------------------------------------|-------------------------------|-------------------------------|------------------------------|---------------------|-------------------------------------------------------------------------------|-------------------------------|
| 1001       | PBMC               | gene panel               | STAT3 D661Y (38%)<br>TET2 G1184D (9%)<br>TET2 Q1445L (5%)                                                  | No (transf dep)          | Pred.; MTX; CsA; EPO                                   | 13                            | 0                             | Yes                          | Yes                 | Telangiectasia                                                                |                               |
| 1002       | PBMC               | gene panel               |                                                                                                            | No (transf dep)          | CP; CsA; EPO; Alemtuzumab                              | 9                             | 1                             | Yes                          | Yes                 | Hashimoto's thyroiditis; DLBCL (in remission)                                 |                               |
| 1059       | PBMC/Saliva        | gene panel               |                                                                                                            | No                       | Never                                                  | 109                           | Never                         | No                           | Yes                 | Ogilvie syndrome                                                              |                               |
| 1061       | PBMC               | gene panel               | STAT3 S614R (13%)                                                                                          | No                       | Never                                                  | 52                            | Never                         | No                           | Yes                 | Psoriasis; Splenectomy                                                        |                               |
| 1086       | PBMC               | gene panel               |                                                                                                            | Pred.                    | MTX (for rheumatoid arthritis)                         | 105                           | 123                           | No                           | Yes                 | Polymyalgia rheumatica; necrotizing vasculitis with thrombosis                |                               |
| 1092       | PBMC/Saliva        | gene panel               |                                                                                                            | No                       | Never                                                  | 47                            | Never                         | No                           | Yes                 |                                                                               |                               |
| 1104       | PBMC/Saliva        | gene panel               | STAT3 Y640F (47%)                                                                                          | No                       | Never                                                  | 162                           | Never                         | No                           | Yes                 | Raynaud's syndrome                                                            |                               |
| 1133       | PBMC               | gene panel               |                                                                                                            | No                       | Rituximab (tx not related to LGLL)                     | 18                            | Never                         | No                           | Yes                 | Marginal zone lymphoma                                                        |                               |
| 1139       | PBMC               | gene panel               |                                                                                                            | No                       | Unknown                                                | 4                             | Unknown                       | Unknown                      | Lost to follow-up   | Splenectomy; Hodgkin's disease (in remission); Pulmonary fibrosis             |                               |
| 1140       | PBMC               | gene panel               |                                                                                                            | No                       | Never                                                  | 12                            | Never                         | No                           | Yes                 |                                                                               |                               |
| 1166       | PBMC               | gene panel               | TET2 T1251fs (43%)                                                                                         | Pred.                    | CP                                                     | 0                             | 0                             | Yes                          | Lost to follow-up   | Neuropathy; Skin rash                                                         |                               |
| 1257       | PBMC/Saliva        | gene panel               | STAT3 E286del (23%)<br>TET2 G1860E (25%)<br>PIK3CD E1021K (23%)                                            | No                       | Never                                                  | 178                           | Never                         | No                           | Yes                 | Carcinoid tumor of appendix                                                   |                               |
| 1289       | PBMC               | gene panel               | STAT3 D661Y (42%)                                                                                          | No                       | MTX; Pred.                                             | 2                             | 2                             | Yes                          | Yes                 | Anemia; Neutropenia                                                           |                               |
| 1340       | PBMC               | gene panel               | STAT3 I659L (4%)                                                                                           | Pred.                    | CP                                                     | 2                             | 0                             | Yes                          | No                  | Thrombocytopenia                                                              |                               |
| 1362       | PBMC/Saliva        | gene panel               | TNFAIP3 Y443fs (7%)                                                                                        | No                       | CP; Pred                                               | 1                             | 3                             | Yes                          | Yes                 |                                                                               |                               |
| 1376       | PBMC               | gene panel               |                                                                                                            | No                       | Never (up to 42 mos follow-up)                         | 42                            | Unknown                       | Unknown                      | Lost to follow-up   | Neuropathy                                                                    |                               |
| 1429       | PBMC               | gene panel               | TET2 R1134fs (33%)<br>TET2 R550Ter (40%)                                                                   | No (Filgrastim)          | Only Filgrastim known (up to 41 mos follow-up)         | 41                            | Unknown                       | Unknown                      | Yes                 |                                                                               |                               |
| 1444       | Enriched NK/Saliva | whole genome, gene panel | STAT3 D661I (39%)<br>TET2 Q1523ter (41%)<br>TET2 F1104fs (42%)<br>TET2 Q897fs (5%)<br>TNFAIP3 N340fs (37%) | No                       | CP; Pred.                                              | 59                            | 0                             | Yes                          | Yes                 | AIHA                                                                          |                               |
| 1483       | PBMC/Saliva        | gene panel               | STAT3 G618R (30%)                                                                                          | No (transf dep)          | CP; Procrit; EPO; Filgrastim                           | 2                             | 3                             | Yes                          | Yes                 | Transfusion dependent anemia secondary to hemolytic anemia; Neutropenia       |                               |
| 1489       | PBMC/Saliva        | gene panel               | STAT3 G618R (32%)                                                                                          | No                       | CP; Pred.                                              | 9                             | 1                             | Yes                          | Lost to follow-up   | Type 1 Diabetes; Anemia; Neutropenia; IgA-kappa monoclonal gammopathy         |                               |
| 1498       | PBMC/Saliva        | gene panel               |                                                                                                            | No                       | CP;                                                    | 0                             | <6                            | Yes                          | Yes                 | Neuropathy                                                                    |                               |
| 1506       | PBMC               | gene panel               | TET2 L1916del (29%)*<br>TNFAIP3 Q241fs (5%)                                                                | No                       | Never                                                  | 6                             | Never                         | No                           | Yes                 |                                                                               |                               |
| 1507       | PBMC               | gene panel               | STAT3 D661Y (32%)<br>TET2 Q764fs (33%)                                                                     | No                       | CP; Pred.                                              | 0                             | 7                             | Yes                          | Yes                 | Anemia; Splenectomy                                                           |                               |
| 1511       | Enriched NK/Saliva | whole genome, gene panel | STAT3 N647I (48%)<br>TET2 E1106fs (11%)*<br>TET2 splice (15%)*                                             | No                       | Never                                                  | 75                            | Never                         | No                           | Yes                 | Diabetes, iron deficiency                                                     |                               |
| 1528       | PBMC               | gene panel               |                                                                                                            | No                       | Never (up to 18 mos follow-up)                         | 18                            | Unknown                       | Unknown                      | Lost to follow-up   |                                                                               |                               |
| 1556       | PBMC               | gene panel               |                                                                                                            | Etanercept               | MTX (for rheumatoid arthritis)                         | 0                             | Unknown                       | Unknown                      | Lost to follow-up   | Rheumatoid arthritis; Type 2 diabetes; psoriasis                              |                               |
| 1573       | PBMC               | gene panel               |                                                                                                            | Pred.                    | MTX; CP; transf dep.                                   | 7                             | 4                             | Yes                          | No                  | Transfusion dependent hemolytic anemia; Hereditary Spherocytosis; Splenectomy |                               |
| 1586       | PBMC               | gene panel               |                                                                                                            | No                       | Unknown                                                | 0                             | Unknown                       | Unknown                      | Lost to follow-up   |                                                                               |                               |
| 1591       | PBMC               | gene panel               | TNFAIP3 S266fs (10%)                                                                                       | No                       | Never (up to 39 mos follow-up)                         | 39                            | Unknown                       | Unknown                      | Yes                 | Psoriasis                                                                     |                               |
| 1612       | PBMC               | gene panel               | TET2 C1271fs (28%)                                                                                         | No (transf dep)          | MTX; CP; Cladribine; Alemtuzumab                       | 82                            | 2                             | Yes                          | Yes                 | Transfusion dependent hemolytic anemia; fibromyalgia                          | T to NK switch                |
| 1644       | PBMC               | gene panel               | TET2 L719fs (28%)*<br>TET2 P1342fs (28%)*                                                                  | MTX; Pred.               | CP; Pegfilgrastim                                      | 1                             | 0                             | Yes                          | No                  | Mouth sore                                                                    |                               |
| 1724       | PBMC/Saliva        | gene panel               |                                                                                                            | MTX                      | CP; Pred.                                              | 51                            | 1                             | Yes                          | Yes                 | Neuropathy; livedo reticularis                                                |                               |
| 1760       | PBMC/Saliva        | gene panel               | STAT3 D661V (37%)                                                                                          | No                       | MTX                                                    | 87                            | 69                            | No                           | Yes                 | Neuropathy; Skin rash                                                         |                               |
| 1768       | PBMC/Saliva        | gene panel               |                                                                                                            | No                       | Never                                                  | 21                            | Never                         | No                           | Yes                 |                                                                               |                               |
| 1791       | PBMC/Saliva        | whole genome, gene panel | STAT3 K658R (43%)                                                                                          | Pred.                    | only Pred. (one-time tx not related to LGLL)           | 2                             | Never                         | No                           | Yes                 | Splenectomy                                                                   |                               |
| 1794       | PBMC               | gene panel               | STAT3 D661Y (34%)                                                                                          | No                       | Never                                                  | 1                             | Never                         | No                           | No                  | Hairy cell leukemia (in remission)                                            |                               |
| 1818       | PBMC/Saliva        | gene panel               | STAT3 N647I (14%)                                                                                          | MTX                      | only MTX                                               | 44                            | 11                            | Yes                          | Yes                 |                                                                               |                               |
| 1820       | Enriched NK/Saliva | whole genome             | TET2 R1452ter (22%)<br>PIK3CD E81K (13%)                                                                   | No                       | Never                                                  | 42                            | Never                         | No                           | Yes                 | Pruritis                                                                      |                               |
| 1823       | PBMC GP            | gene panel               |                                                                                                            | No                       | Never (up to 36 mos follow-up)                         | 36                            | Unknown                       | Unknown                      | Yes                 |                                                                               |                               |
| 1856       | PBMC/Saliva        | whole genome, gene panel | Global CNV                                                                                                 | No                       | Pred.; MTX                                             | 2                             | 61                            | No                           | Yes                 |                                                                               |                               |
| 1862       | PBMC/Saliva        | whole genome, gene panel | TNFAIP3 Q379ter (46%)<br>TNFAIP3 M433fs (44%)                                                              | Pred.                    | CP; CsA; MTX                                           | 11                            | 3                             | Yes                          | No                  | Intention tremor; Erythematous rash; Psoriasis                                |                               |
| 1866       | Enriched NK/Saliva | whole genome             | PIK3AP1 S718N (28%)<br>Global CNV                                                                          | Pred.                    | MTX                                                    | 0                             | 0                             | Yes                          | Yes                 | Mouth sores                                                                   |                               |
| 1870       | PBMC/Saliva        | gene panel               | TET2 L1872R (12%)                                                                                          | CsA; Pred.               | CP; MTX                                                | 75                            | 49                            | Yes                          | Yes                 | Beta thalassemia; Pure red cell aplasia                                       |                               |
| 1882       | PBMC/Saliva        | gene panel               |                                                                                                            | Pred. (transf dep)       | MTX                                                    | 23                            | <12                           | Yes                          | Lost to follow-up   | Paranoid schizophrenia                                                        |                               |
| 1909       | PBMC/Saliva        | gene panel               | STAT3 S614R (28%)<br>TET2 C1633ter (29%)*                                                                  | Pred. (transf dep)       | CP; Pred.; Rituximab                                   | 1                             | 1                             | Yes                          | Yes                 | Transfusion dependent anemia secondary to coombs negative hemolysis           |                               |
| 1928       | PBMC/Saliva        | gene panel               |                                                                                                            | No                       | Pred.; Filgrastim; CsA; MTX (for rheumatoid arthritis) | 46                            | <26                           | No                           | Yes                 | Rheumatoid arthritis                                                          |                               |
| 1967       | PBMC/Saliva        | gene panel               | STAT3 S614R (12%)<br>TET2 E1268ter (43%)*<br>TET2 P1013fs (36%)*                                           | Pred.                    | CP                                                     | 0                             | 0                             | Yes                          | Lost to follow-up   |                                                                               |                               |
| 1978       | PBMC/Saliva        | gene panel               |                                                                                                            | No                       | Never (up to 9 mos follow-up)                          | 1                             | Unknown                       | Unknown                      | Lost to follow-up   | Hemochromatosis                                                               |                               |
| 1984       | PBMC/Saliva        | gene panel               |                                                                                                            | No                       | Never (up to 26 mos follow-up)                         | 3                             | Unknown                       | Unknown                      | Lost to follow-up   | Sjogren's disease; neuropathy                                                 |                               |
| 2003       | PBMC/Saliva        | gene panel               | STAT3 Y640F (43%)                                                                                          | CP                       | Pred.                                                  | 16                            | 0                             | Yes                          | Yes                 |                                                                               | EBV nuclear antibody positive |
| 2010       | PBMC/Saliva        | gene panel               | TET2 Q720ter (14%)                                                                                         | CP                       | Pred.                                                  | 2                             | 0                             | Yes                          | Not yet achieved    | Insulin dependent diabetes                                                    |                               |
| 2011       | PBMC/Saliva        | gene panel               |                                                                                                            | MTX                      | Pred.                                                  | 10                            | 2                             | Yes                          | Yes                 | Periventricular leukomalacia; complex partial seizures                        |                               |
| 2012       | PBMC/Saliva        | gene panel               | STAT3 D661Y (36%)                                                                                          | No                       | CP                                                     | 1                             | 3                             | Yes                          | Not yet achieved    |                                                                               |                               |
| 2069       | PBMC/Saliva        | gene panel               | TET2 R814fs (4%)                                                                                           | No                       | CP; Pred.                                              | 18                            | 6                             | Yes                          | Not yet achieved    |                                                                               |                               |
| 2079       | PBMC/Saliva        | gene panel               |                                                                                                            | MTX                      | only MTX                                               | 67                            | 1                             | Yes                          | Yes                 | Arrhythmic right ventricular cardiomyopathy                                   |                               |
| 2099       | PBMC/Saliva        | gene panel               |                                                                                                            | No                       | MTX; Pred.                                             | 4                             | 1                             | Yes                          | Not yet achieved    | Polymyalgia Rheumatica                                                        |                               |
| 2104       | PBMC/Saliva        | gene panel               |                                                                                                            | No                       | MTX                                                    | 16                            | 5                             | Yes                          | Yes                 | Sjogren's disease; asthma                                                     |                               |
| 2112       | PBMC/Saliva        | gene panel               | TNFAIP3 C200fs (8%)<br>TNFAIP3 V209_S211 delinsA (8%)                                                      | No                       | Never (up to 50 mos follow-up)                         | 6                             | Unknown                       | Unknown                      | Not yet achieved    | Rosacea                                                                       |                               |

# Supplemental Table 1C: Flow Cytometry and Bone Marrow Data

\* = mutation validated in CD94+/CD94- Sanger, CD markers = peripheral blood data, MDS=myelodysplastic syndrome, NK=natural killer

| Patient ID | Sample types       | Sequencing type          | Mutations in STAT3, TET2, TNFAIP3, PI3KCD, PIK3AP1                                                         | CD16+ | CD56+ | CD94+ | CD3-CD16+                                       | CD3-CD56+ | CD3-CD57+ | Bone marrow morphology | NK cell infiltration of marrow | Cytogenetics and/or FISH Data                |
|------------|--------------------|--------------------------|------------------------------------------------------------------------------------------------------------|-------|-------|-------|-------------------------------------------------|-----------|-----------|------------------------|--------------------------------|----------------------------------------------|
| 1001       | PBMC               | gene panel               | STAT3 D661Y (38%)<br>TET2 G1184D (9%)<br>TET2 Q1445L (5%)                                                  |       | 4%    |       | 59%                                             |           |           | no MDS                 | yes                            | not done                                     |
| 1002       | PBMC               | gene panel               |                                                                                                            |       |       |       |                                                 |           |           | no MDS                 | yes                            | normal cytogenetics                          |
| 1059       | PBMC/Saliva        | gene panel               |                                                                                                            |       |       |       |                                                 |           |           |                        |                                | not available                                |
| 1061       | PBMC               | gene panel               | STAT3 S614R (13%)                                                                                          | 68%   | 5%    | 39%   |                                                 |           |           |                        |                                | not available                                |
| 1086       | PBMC               | gene panel               |                                                                                                            | 22%   | 33%   | 24%   |                                                 |           |           |                        |                                | not available                                |
| 1092       | PBMC/Saliva        | gene panel               |                                                                                                            | 79%   | 80%   |       |                                                 |           |           |                        |                                | not available                                |
| 1104       | PBMC/Saliva        | gene panel               | STAT3 Y640F (47%)                                                                                          | 64%   | 1%    |       |                                                 |           |           | no MDS                 | no                             | not done                                     |
| 1133       | PBMC               | gene panel               |                                                                                                            |       |       |       |                                                 |           |           |                        |                                | not available                                |
| 1139       | PBMC               | gene panel               |                                                                                                            | 65%   | 3%    |       |                                                 |           |           | no MDS                 | no                             | normal cytogenetics                          |
| 1140       | PBMC               | gene panel               |                                                                                                            | 89%   | 31%   |       |                                                 |           |           | no MDS                 | yes                            | not done                                     |
| 1166       | PBMC               | gene panel               | TET2 T1251fs (43%)                                                                                         | 50%   | 63%   |       |                                                 |           |           | no MDS                 | yes                            | not done                                     |
| 1257       | PBMC/Saliva        | gene panel               | STAT3 E286del (23%)<br>TET2 G1860E (25%)<br>PIK3CD E1021K (23%)                                            | 56%   | 0%    | 56%   |                                                 |           |           | no MDS                 | no                             | not done                                     |
| 1289       | PBMC               | gene panel               | STAT3 D661Y (42%)                                                                                          | 2%    | 5%    |       |                                                 |           | 29%       | no MDS                 | yes                            | not done                                     |
| 1340       | PBMC               | gene panel               | STAT3 I659L (4%)                                                                                           | 60%   | 66%   | 66%   |                                                 |           |           | no MDS                 | yes                            | normal cytogenetics                          |
| 1362       | PBMC/Saliva        | gene panel               | TNFAIP3 Y443fs (7%)                                                                                        | 55%   | 73%   | 72%   |                                                 | 73%       |           | no MDS                 | yes                            | normal cytogenetics                          |
| 1376       | PBMC               | gene panel               |                                                                                                            | 7%    | 1%    |       |                                                 |           |           | no MDS                 | no                             | not done                                     |
| 1429       | PBMC               | gene panel               | TET2 R1134fs (33%)<br>TET2 R550Ter (40%)                                                                   |       | 48%   |       |                                                 |           | 23%       | no MDS                 | yes                            | not done                                     |
| 1444       | Enriched NK/Saliva | whole genome, gene panel | STAT3 D661I (39%)<br>TET2 Q1523ter (41%)<br>TET2 F1104fs (42%)<br>TET2 Q897fs (5%)<br>TNFAIP3 N340fs (37%) | 15%   | 62%   | 67%   |                                                 | 61%       |           | no MDS                 | yes                            | not done                                     |
| 1483       | PBMC/Saliva        | gene panel               | STAT3 G618R (30%)                                                                                          | 73%   | 15%   | 4%    |                                                 |           |           | no MDS                 | yes                            | normal cytogenetics; FISH neg.               |
| 1489       | PBMC/Saliva        | gene panel               | STAT3 G618R (32%)                                                                                          | 80%   | 5%    | 79%   |                                                 |           |           | no MDS                 | yes                            | 11:14 translocation FISH                     |
| 1498       | PBMC/Saliva        | gene panel               |                                                                                                            | 51%   | 61%   | 59%   |                                                 |           |           | no MDS                 | yes                            | not done                                     |
| 1506       | PBMC               | gene panel               | TET2 L1916del (29%)*<br>TNFAIP3 Q241fs (5%)                                                                |       |       |       | NK cells incr ~70% of lymphoid cells; no values |           |           | no MDS                 | no                             | not done                                     |
| 1507       | PBMC               | gene panel               | STAT3 D661Y (32%)<br>TET2 Q764fs (33%)                                                                     | 76%   | 3%    | 15%   |                                                 |           |           | no MDS                 | yes                            | normal cytogenetics                          |
| 1511       | Enriched NK/Saliva | whole genome, gene panel | STAT3 N647I (48%)<br>TET2 E1106fs (11%)*<br>TET2 splice (15%)*                                             |       |       |       | CD2+ mod CD7+ mod, CD56+ dim, CD57+ dim         |           |           | no MDS                 | yes                            | normal cytogenetics                          |
| 1528       | PBMC               | gene panel               |                                                                                                            |       |       |       |                                                 |           |           | no MDS                 | yes                            | normal cytogenetics                          |
| 1556       | PBMC               | gene panel               |                                                                                                            | 32%   | 34%   | 23%   | 30%                                             | 32%       |           |                        |                                | not available                                |
| 1573       | PBMC               | gene panel               |                                                                                                            | 35%   |       | 28%   | 32%                                             | 45%       |           | no MDS                 | yes                            | normal cytogenetics; MDS FISH neg.           |
| 1586       | PBMC               | gene panel               |                                                                                                            | 71%   | 45%   | 75%   |                                                 | 45%       |           | no MDS                 | yes                            | normal cytogenetics; FISH neg.               |
| 1591       | PBMC               | gene panel               | TNFAIP3 S266fs (10%)                                                                                       | 71%   | 71%   |       |                                                 |           |           | no MDS                 | yes                            | not done                                     |
| 1612       | PBMC               | gene panel               | TET2 C1271fs (28%)                                                                                         | 22%   | 22%   |       |                                                 |           |           | no MDS                 | yes                            | normal cytogenetics                          |
| 1644       | PBMC               | gene panel               | TET2 L719fs (28%)*<br>TET2 P1342fs (28%)*                                                                  | 15%   | 33%   | 10%   |                                                 | 33%       |           | no MDS                 | no                             | normal cytogenetics; MDS & BCR/ABL FISH neg. |
| 1724       | PBMC/Saliva        | gene panel               |                                                                                                            | 18%   | 12%   | 46%   |                                                 | 11%       |           | no MDS                 | yes                            | not done                                     |
| 1760       | PBMC/Saliva        | gene panel               | STAT3 D661V (37%)                                                                                          | 48%   | 1%    | 7%    | 48%                                             | 1%        | 55%       |                        |                                | not available                                |
| 1768       | PBMC/Saliva        | gene panel               |                                                                                                            | 2%    | 45%   | 51%   |                                                 | 42%       | 28%       |                        |                                | not available                                |
| 1791       | PBMC/Saliva        | whole genome, gene panel | STAT3 K658R (43%)                                                                                          | 93%   | 6%    | 93%   | 93%                                             | 6%        |           | no MDS                 | no                             | normal cytogenetics; MDS & BCR/ABL FISH neg. |
| 1794       | PBMC               | gene panel               | STAT3 D661Y (34%)                                                                                          |       |       |       |                                                 | 35%       |           | no MDS                 | no                             | not done                                     |
| 1818       | PBMC/Saliva        | gene panel               | STAT3 N647I (14%)                                                                                          |       |       |       |                                                 |           |           | no MDS                 | yes                            | not done                                     |
| 1820       | Enriched NK/Saliva | whole genome             | TET2 R1452ter (22%)<br>PIK3CD E81K (13%)                                                                   | 48%   | 26%   | 53%   | 47%                                             | 24%       | 44%       | no MDS                 | yes                            | not done                                     |
| 1823       | PBMC GP            | gene panel               |                                                                                                            | 70%   | 70%   |       |                                                 |           |           |                        |                                | not available                                |
| 1856       | PBMC/Saliva        | whole genome, gene panel | Global CNV                                                                                                 | 78%   | 74%   | 76%   | 76%                                             | 75%       | 17%       | no MDS                 | yes                            | normal cytogenetics                          |
| 1862       | PBMC/Saliva        | whole genome, gene panel | TNFAIP3 Q379ter (46%)<br>TNFAIP3 M433fs (44%)                                                              | 29%   | 56%   | 94%   | 29%                                             | 56%       | 21%       | no MDS                 | yes                            | abnormal cyto: EVI-1 on 3q26 FISH            |
| 1866       | Enriched NK/Saliva | whole genome             | PIK3AP1 S718N (28%)<br>Global CNV                                                                          | 63%   | 16%   | 63%   | 63%                                             | 16%       | 43%       | no MDS                 | yes                            | normal cytogenetics                          |
| 1870       | PBMC/Saliva        | gene panel               | TET2 L1872R (12%)                                                                                          | 29%   | 0%    | 35%   | 29%                                             | 0%        | 0%        | no MDS                 | yes                            | not done                                     |
| 1882       | PBMC/Saliva        | gene panel               |                                                                                                            | 0%    | 22%   | 82%   | 0%                                              | 21%       | 48%       | no MDS                 | yes                            | normal cytogenetics; MDS FISH neg.           |
| 1909       | PBMC/Saliva        | gene panel               | STAT3 S614R (28%)<br>TET2 C1633ter (29%)*                                                                  | 84%   | 2%    | 83%   |                                                 |           |           | no MDS                 | no                             | normal cytogenetics; MDS FISH neg.           |
| 1928       | PBMC/Saliva        | gene panel               |                                                                                                            |       |       |       |                                                 |           |           | no MDS                 | yes                            | normal cytogenetics                          |
| 1967       | PBMC/Saliva        | gene panel               | STAT3 S614R (12%)<br>TET2 E1268ter (43%)*<br>TET2 P1013fs (38%)*                                           | 67%   |       |       |                                                 |           | 67%       | no MDS                 | yes                            | normal cytogenetics                          |
| 1978       | PBMC/Saliva        | gene panel               |                                                                                                            |       |       |       |                                                 |           |           | no MDS                 | yes                            | normal cytogenetics                          |
| 1984       | PBMC/Saliva        | gene panel               |                                                                                                            |       |       |       |                                                 |           |           | no MDS                 | no                             | normal cytogenetics                          |
| 2003       | PBMC/Saliva        | gene panel               | STAT3 Y640F (43%)                                                                                          | 86%   | 5%    | 1%    | 86%                                             | 4%        | 12%       | no MDS                 | yes                            | normal cytogenetics                          |
| 2010       | PBMC/Saliva        | gene panel               | TET2 Q720ter (14%)                                                                                         | 39%   | 36%   | 46%   | 39%                                             | 32%       | 38%       | no MDS                 | yes                            | normal cytogenetics                          |
| 2011       | PBMC/Saliva        | gene panel               |                                                                                                            | 48%   | 3%    | 57%   | 48%                                             | 2%        | 17%       | no MDS                 | yes                            | normal cytogenetics                          |
| 2012       | PBMC/Saliva        | gene panel               | STAT3 D661Y (36%)                                                                                          | 82%   | 22%   | 84%   | 82%                                             | 22%       | 21%       | no MDS                 | yes                            | normal cytogenetics; FISH neg.               |
| 2069       | PBMC/Saliva        | gene panel               | TET2 R814fs (4%)                                                                                           | 58%   | 2%    | 0%    | 58%                                             | 1%        | 41%       | no MDS                 | yes                            | normal cytogenetics                          |
| 2079       | PBMC/Saliva        | gene panel               |                                                                                                            | 12%   | 14%   | 8%    | 10%                                             | 9%        | 3%        | no MDS                 | yes                            | normal cytogenetics                          |
| 2099       | PBMC/Saliva        | gene panel               |                                                                                                            | 0%    | 31%   | 2%    | 0%                                              | 30%       | 36%       | no MDS                 | no                             | normal cytogenetics; FISH neg.               |
| 2104       | PBMC/Saliva        | gene panel               |                                                                                                            | 23%   | 21%   | 9%    | 23%                                             | 19%       | 13%       | no MDS                 | yes                            | normal cytogenetics; FISH neg.               |
| 2112       | PBMC/Saliva        | gene panel               | TNFAIP3 C200fs (8%)<br>TNFAIP3 V209_S211 delinsA (8%)                                                      | 31%   | 65%   | 65%   | 31%                                             | 65%       | 32%       |                        |                                | not available                                |

# Supplemental Table 1D: Immunosuppressive Treatment Response

\* = mutation validated in CD94+/CD94- Sanger, Dx=diagnosis, Tx=treatment, Pred=prednisone, MTX=methotrexate, CP=cyclophosphamide, CsA=cyclosporine A

NE=not evaluable, CR=complete response, PR=partial response, NR=no response

| Patient ID | Mutations in STAT3, TET2, TFNAIP3, PI3KCD, PIK3AP1                                                         | 1st LGLL Tx | MTX      |             |         | CP       |             |         | CsA      |             |         |
|------------|------------------------------------------------------------------------------------------------------------|-------------|----------|-------------|---------|----------|-------------|---------|----------|-------------|---------|
|            |                                                                                                            |             | Response | Dx→Tx (mos) | w/ Pred | Response | Dx→Tx (mos) | w/ Pred | Response | Dx→Tx (mos) | w/ Pred |
| 1002       |                                                                                                            | CP          |          |             |         | NR       | 1           | No      | NR       | 12          | No      |
| 1362       | TNFAIP3 Y443fs (7%)                                                                                        | CP+Pred     |          |             |         | NE       | 3           | Yes     |          |             |         |
| 1498       |                                                                                                            | CP          |          |             |         | NE       | <6          | No      |          |             |         |
| 1573       |                                                                                                            | Pred        | PR       | 7           | Yes     | PR       | 12          | No      |          |             |         |
| 1724       |                                                                                                            | CP+Pred     | NE       | 2           | No      | NE       | 1           | Yes     |          |             |         |
| 1856       | Global CNV                                                                                                 | Pred        | NE       | 63          | No      |          |             |         |          |             |         |
| 1862       | TNFAIP3 Q379ter (46%)<br>TNFAIP3 M433fs (44%)                                                              | Pred        | NR       | 27          | Yes     | CR       | 11          | Yes     | NE       | 31          | Yes     |
| 1866       | PIK3AP1 S718N (28%)<br>Global CNV                                                                          | MTX         | NE       | 0           | No      |          |             |         |          |             |         |
| 1882       |                                                                                                            | MTX+Pred    | NR       | <12         | Yes     |          |             |         |          |             |         |
| 2011       |                                                                                                            | MTX+Pred    | PR       | 2           | Yes     |          |             |         |          |             |         |
| 2079       |                                                                                                            | MTX         | CR       | 1           | No      |          |             |         |          |             |         |
| 2099       |                                                                                                            | MTX         | NR       | 1           | No      |          |             |         |          |             |         |
| 2104       |                                                                                                            | MTX         | NE       | 5           | No      |          |             |         |          |             |         |
| 1289       | STAT3 D661Y (42%)                                                                                          | MTX         | PR       | 2           | No      |          |             |         |          |             |         |
| 1340       | STAT3 I659L (4%)                                                                                           | Pred        |          |             |         | NE       | 0           | yes     |          |             |         |
| 1483       | STAT3 G618R (30%)                                                                                          | CP          |          |             |         | CR       | 3           | No      |          |             |         |
| 1489       | STAT3 G618R (32%)                                                                                          | CP          |          |             |         | PR       | 1           | No      |          |             |         |
| 1760       | STAT3 D661V (37%)                                                                                          | MTX         | NE       | 69          | No      |          |             |         |          |             |         |
| 1818       | STAT3 N647I (14%)                                                                                          | MTX         | CR       | 11          | No      |          |             |         |          |             |         |
| 2003       | STAT3 Y640F (43%)                                                                                          | Pred        |          |             |         | PR       | 3           | No      |          |             |         |
| 2012       | STAT3 D661Y (36%)                                                                                          | CP          |          |             |         | CR       | 3           | No      |          |             |         |
| 1166       | TET2 T1251fs (43%)                                                                                         | CP+Pred     |          |             |         | NE       | 0           | Yes     |          |             |         |
| 1612       | TET2 C1271fs (28%)                                                                                         | cladribine  | NR       | 75          | No      | NR       | 82          | No      |          |             |         |
| 1644       | TET2 L719fs (28%)*<br>TET2 P1342fs (28%)*                                                                  | MTX+Pred    | NR       | 0           | yes     | NR       | 9           | Yes     |          |             |         |
| 1870       | TET2 L1872R (12%)*                                                                                         | CsA+Pred    | NR       | 70          | No      | NR       | 67          | No      | NR       | 49          | Yes     |
| 2010       | TET2 Q720ter (14%)                                                                                         | Pred        |          |             |         | NR       | 1           | No      |          |             |         |
| 2069       | TET2 R814fs (4%)                                                                                           | CP+Pred     |          |             |         | CR       | 6           | Yes     |          |             |         |
| 1001       | STAT3 D661Y (38%)<br>TET2 G1184D (9%)<br>TET2 Q1445L (5%)                                                  | CsA         | NR       | 4           | Yes     |          |             |         | NR       | 0           | No      |
| 1444       | STAT3 D661I (39%)<br>TET2 Q1523ter (41%)<br>TET2 F1104fs (42%)<br>TET2 Q897fs (5%)<br>TNFAIP3 N340fs (37%) | CP+Pred     |          |             |         | CR       | 0           | Yes     |          |             |         |
| 1507       | STAT3 D661Y (32%)<br>TET2 Q764fs (33%)                                                                     | CP+Pred     |          |             |         | CR       | 7           | Yes     |          |             |         |
| 1909       | STAT3 S614R (28%)<br>TET2 C1633ter (29%)*                                                                  | CP+Pred     |          |             |         | CR       | 1           | Yes     |          |             |         |
| 1967       | STAT3 S614R (12%)<br>TET2 E1268ter (43%)*<br>TET2 P1013fs (38%)*                                           | CP+Pred     |          |             |         | CR       | 0           | Yes     |          |             |         |



## Supplemental Table 2: Mutect2 Somatic Mutation Calls from Seven WGS Samples in this Study.

Variants with the variant classifications missense, nonsense, nonstop, splice site, and transcriptional start site with the biotype protein coding are included here.

| Sample ID | Hugo Symbol | HGVSp Short   | Chromosome | Start     | Variant Classification | Reference Allele | Tumor Allele2 | HGVSc       | tumor_vaf |
|-----------|-------------|---------------|------------|-----------|------------------------|------------------|---------------|-------------|-----------|
| 1444      | C1orf213    | p.F77C        | 1          | 23696020  | Missense               | T                | G             | c.230T>G    | 0.12      |
| 1444      | ZNF697      | p.S475I       | 1          | 120165542 | Missense               | C                | A             | c.1424G>T   | 0.38      |
| 1444      | NBPF14      | p.A38T        | 1          | 148024903 | Missense               | C                | T             | c.111G>A    | 0.13      |
| 1444      | RPTN        | p.N448S       | 1          | 152128232 | Missense               | T                | C             | c.1343A>G   | 0.42      |
| 1444      | F5          | p.P1242L      | 1          | 169510603 | Missense               | G                | A             | c.3725C>T   | 0.07      |
| 1444      | FMO1        | p.M452I       | 1          | 171254440 | Missense               | G                | C             | c.1356G>C   | 0.49      |
| 1444      | ZNF678      | p.V402E       | 1          | 227843156 | Missense               | T                | A             | c.1205T>A   | 0.12      |
| 1444      | CEP170      | p.S792*       | 1          | 243328887 | Nonsense               | G                | T             | c.2375C>A   | 0.07      |
| 1444      | RGPD4       | p.G589S       | 2          | 108477228 | Missense               | G                | A             | c.1765G>A   | 0.13      |
| 1444      | RGPD8       | p.V1041I      | 2          | 113147401 | Missense               | C                | T             | c.3121G>A   | 0.11      |
| 1444      | CCNT2       | p.D711N       | 2          | 135712156 | Missense               | G                | A             | c.2131G>A   | 0.04      |
| 1444      | DNAJB2      | p.F46L        | 2          | 220145370 | Missense               | T                | C             | c.136T>C    | 0.04      |
| 1444      | C3orf20     | p.S718C       | 3          | 14799089  | Missense               | A                | T             | c.2152A>T   | 0.40      |
| 1444      | MUC13       | p.S24*        | 3          | 124646819 | Nonsense               | G                | C             | c.71C>G     | 0.34      |
| 1444      | COL6A6      | p.R327Q       | 3          | 130284156 | Missense               | G                | A             | c.980G>A    | 0.36      |
| 1444      | ZNF141      | p.F267S       | 4          | 367026    | Missense               | T                | C             | c.800T>C    | 0.11      |
| 1444      | TET2        | p.Q1523*      | 4          | 106196234 | Nonsense               | C                | T             | c.4567C>T   | 0.37      |
| 1444      | LRP2BP      | p.V250L       | 4          | 186294065 | Missense               | C                | G             | c.748G>C    | 0.42      |
| 1444      | MUC22       | p.F749S       | 6          | 30995454  | Missense               | T                | C             | c.2246T>C   | 0.16      |
| 1444      | MUC22       | p.E990A       | 6          | 30996177  | Missense               | A                | C             | c.2969A>C   | 0.11      |
| 1444      | GSTA5       | p.D101Y       | 6          | 52699052  | Missense               | C                | A             | c.301G>T    | 0.39      |
| 1444      | FAM120B     | p.C356Y       | 6          | 170627545 | Missense               | G                | A             | c.1067G>A   | 0.04      |
| 1444      | GLI3        | p.G1241E      | 7          | 42004949  | Missense               | C                | T             | c.3722G>A   | 0.04      |
| 1444      | SPDYE1      | p.G234R       | 7          | 44046934  | Missense               | G                | A             | c.700G>A    | 0.07      |
| 1444      | AUTS2       | p.X634_splice | 7          | 70239087  | Splice_Site            | T                | C             | c.1902+2T>C | 0.05      |
| 1444      | ZAN         | p.S916P       | 7          | 100350474 | Missense               | T                | C             | c.2746T>C   | 0.24      |
| 1444      | MUC12       | p.S4353P      | 7          | 100646901 | Missense               | T                | C             | c.13057T>C  | 0.07      |
| 1444      | KCND2       | p.P401L       | 7          | 120373043 | Missense               | C                | T             | c.1202C>T   | 0.44      |
| 1444      | TMEM229A    | p.V71L        | 7          | 123672847 | Missense               | C                | A             | c.211G>T    | 0.37      |
| 1444      | MGAM        | p.A1027S      | 7          | 141752704 | Missense               | G                | T             | c.3079G>T   | 0.10      |
| 1444      | UNC5D       | p.K637R       | 8          | 35606188  | Missense               | A                | G             | c.1910A>G   | 0.04      |
| 1444      | TYRP1       | p.Y438H       | 9          | 12708047  | Missense               | T                | C             | c.1312T>C   | 0.36      |
| 1444      | TRPM6       | p.F576L       | 9          | 77418715  | Missense               | A                | G             | c.1726T>C   | 0.06      |
| 1444      | LRR8A       | p.S395L       | 9          | 131670627 | Missense               | C                | T             | c.1184C>T   | 0.36      |
| 1444      | C9orf96     | p.G17S        | 9          | 136243393 | Missense               | G                | A             | c.49G>A     | 0.42      |
| 1444      | FRMD4A      | p.A181V       | 10         | 13789742  | Missense               | G                | A             | c.542C>T    | 0.18      |
| 1444      | RIC8A       | p.D42V        | 11         | 209311    | Missense               | A                | T             | c.125A>T    | 0.41      |
| 1444      | ZNF195      | p.Q164R       | 11         | 3381747   | Missense               | T                | C             | c.491A>G    | 0.05      |
| 1444      | AHNAK       | p.M2007V      | 11         | 62295870  | Missense               | T                | C             | c.6019A>G   | 0.09      |
| 1444      | ANO4        | p.R78Q        | 12         | 101336195 | Missense               | G                | A             | c.233G>A    | 0.04      |
| 1444      | UNC119B     | p.T80A        | 12         | 121148515 | Missense               | A                | G             | c.238A>G    | 0.42      |
| 1444      | CKAP2       | p.Y646H       | 13         | 53049160  | Missense               | T                | C             | c.1936T>C   | 0.03      |
| 1444      | EIF2B2      | p.Q128*       | 14         | 75470351  | Nonsense               | C                | T             | c.382C>T    | 0.45      |
| 1444      | SYNE3       | p.*976Yext*7  | 14         | 95884163  | Nonstop                | T                | G             | c.2928A>C   | 0.06      |
| 1444      | PLD4        | p.A331T       | 14         | 105398157 | Missense               | G                | A             | c.991G>A    | 0.40      |
| 1444      | FKSG62      | p.E5A         | 15         | 47426211  | Missense               | T                | G             | c.14A>C     | 0.07      |
| 1444      | AC137056.1  | p.D101E       | 16         | 20499844  | Missense               | T                | G             | c.303T>G    | 0.20      |
| 1444      | GTF3C1      | p.V523A       | 16         | 27517422  | Missense               | A                | G             | c.1568T>C   | 0.44      |
| 1444      | MMP2        | p.D615N       | 16         | 55536764  | Missense               | G                | A             | c.1843G>A   | 0.40      |
| 1444      | ARHGEF15    | p.N49T        | 17         | 8215503   | Missense               | A                | C             | c.146A>C    | 0.20      |
| 1444      | STAT3       | p.D661V       | 17         | 40474419  | Missense               | T                | A             | c.1982A>T   | 0.41      |
| 1444      | STAT3       | p.D661N       | 17         | 40474420  | Missense               | C                | T             | c.1981G>A   | 0.41      |
| 1444      | COA3        | p.A66S        | 17         | 40950504  | Missense               | C                | A             | c.196G>T    | 0.41      |
| 1444      | PPM1D       | p.R552*       | 17         | 58740749  | Nonsense               | C                | T             | c.1654C>T   | 0.06      |
| 1444      | CD209       | p.L120Q       | 19         | 7810793   | Missense               | A                | T             | c.359T>A    | 0.08      |
| 1444      | RDH8        | p.I198F       | 19         | 10131474  | Missense               | A                | T             | c.592A>T    | 0.34      |
| 1444      | ZNF844      | p.F487L       | 19         | 12187394  | Missense               | T                | C             | c.1459T>C   | 0.11      |
| 1444      | ZNF430      | p.S480T       | 19         | 21240552  | Missense               | T                | A             | c.1438T>A   | 0.08      |

| Sample | Hugo Symbol | HGVSp Short    | Chromosome | Start     | Variant Classification | Reference Allele | Tumor Allele2 | HGVSc       | tumor_vaf |
|--------|-------------|----------------|------------|-----------|------------------------|------------------|---------------|-------------|-----------|
| 1444   | ZNF724P     | p.V582I        | 19         | 23405303  | Missense               | C                | T             | c.1744G>A   | 0.05      |
| 1444   | ZNF681      | p.K405Q        | 19         | 23927139  | Missense               | T                | G             | c.1213A>C   | 0.13      |
| 1444   | PNKP        | p.S143*        | 19         | 50368454  | Nonsense               | G                | C             | c.428C>G    | 0.11      |
| 1444   | RBM12       | p.R423G        | 20         | 34241978  | Missense               | T                | C             | c.1267A>G   | 0.37      |
| 1444   | FAM230A     | p.Q507H        | 22         | 20709789  | Missense               | A                | C             | c.1521A>C   | 0.27      |
| 1444   | TRIOBP      | p.L801P        | 22         | 38120965  | Missense               | T                | C             | c.2402T>C   | 0.15      |
| 1444   | PABPC1L2B   | p.S181Y        | X          | 72224023  | Missense               | C                | A             | c.542C>A    | 0.30      |
| 1444   | MAGEC1      | p.H661Q        | X          | 140995173 | Missense               | T                | G             | c.1983T>G   | 0.15      |
| 1444   | ARHGAP4     | p.Q14*         | X          | 153191617 | Nonsense               | G                | A             | c.40C>T     | 0.72      |
| 1511   | NBPF1       | p.F314S        | 1          | 16912031  | Missense               | A                | G             | c.941T>C    | 0.03      |
| 1511   | UBXN11      | p.S494R        | 1          | 26608873  | Missense               | T                | G             | c.1480A>C   | 0.15      |
| 1511   | NBPF9       | p.D636E        | 1          | 144828640 | Missense               | C                | G             | c.1907C>G   | 0.05      |
| 1511   | NBPF10      | p.K2709N       | 1          | 145353585 | Missense               | G                | C             | c.8127G>C   | 0.14      |
| 1511   | HRNR        | p.R1996H       | 1          | 152188118 | Missense               | C                | T             | c.5987G>A   | 0.04      |
| 1511   | USH2A       | p.T4839M       | 1          | 215821936 | Missense               | G                | A             | c.14516C>T  | 0.03      |
| 1511   | ITPRIPL1    | p.S277A        | 2          | 96993174  | Missense               | T                | G             | c.829T>G    | 0.06      |
| 1511   | REV1        | p.R595H        | 2          | 100038008 | Missense               | C                | T             | c.1784G>A   | 0.48      |
| 1511   | RGPD8       | p.L1095P       | 2          | 113147238 | Missense               | A                | G             | c.3284T>C   | 0.18      |
| 1511   | TUBA3D      | p.R221S        | 2          | 132237927 | Missense               | C                | A             | c.661C>A    | 0.08      |
| 1511   | NFE2L2      | p.V591L        | 2          | 178095560 | Missense               | C                | G             | c.1771G>C   | 0.19      |
| 1511   | CACNA2D3    | p.R440L        | 3          | 54798317  | Missense               | G                | T             | c.1319G>T   | 0.03      |
| 1511   | ZDHHC23     | p.V169I        | 3          | 113672890 | Missense               | G                | A             | c.505G>A    | 0.08      |
| 1511   | ZNF721      | p.T565A        | 4          | 436563    | Missense               | T                | C             | c.1693A>G   | 0.05      |
| 1511   | GAK         | p.X330_splice  | 4          | 887163    | Splice_Site            | A                | C             | c.990+2T>G  | 0.08      |
| 1511   | CC2D2A      | p.P1473H       | 4          | 15597811  | Missense               | C                | A             | c.4418C>A   | 0.07      |
| 1511   | TET2        | p.X1394_splice | 4          | 106190905 | Splice_Site            | G                | T             | c.4182+1G>T | 0.19      |
| 1511   | MYO10       | p.R1834Q       | 5          | 16671017  | Missense               | C                | T             | c.5501G>A   | 0.11      |
| 1511   | MRPS27      | p.X94_splice   | 5          | 71533956  | Splice_Site            | C                | G             | c.282-1G>C  | 0.03      |
| 1511   | C1QTNF2     | p.P86S         | 5          | 159781898 | Missense               | G                | A             | c.256C>T    | 0.05      |
| 1511   | SYNCRIP     | p.G449V        | 6          | 86325000  | Missense               | C                | A             | c.1346G>T   | 0.11      |
| 1511   | ZNF92       | p.D372E        | 7          | 64864143  | Missense               | T                | A             | c.1116T>A   | 0.10      |
| 1511   | HIP1        | p.D415G        | 7          | 75189167  | Missense               | T                | C             | c.1244A>G   | 0.03      |
| 1511   | CSMD1       | p.A2374T       | 8          | 2954389   | Missense               | C                | T             | c.7120G>A   | 0.08      |
| 1511   | PSD3        | p.P16L         | 8          | 18941993  | Missense               | G                | A             | c.47C>T     | 0.08      |
| 1511   | ZFHX4       | p.R2926Q       | 8          | 77767934  | Missense               | G                | A             | c.8777G>A   | 0.03      |
| 1511   | C8orf33     | p.I210V        | 8          | 146279481 | Missense               | A                | G             | c.628A>G    | 0.03      |
| 1511   | FRMPD1      | p.G137R        | 9          | 37719066  | Missense               | G                | C             | c.409G>C    | 0.52      |
| 1511   | ANKRD20A4   | p.L524H        | 9          | 69423275  | Missense               | T                | A             | c.1571T>A   | 0.02      |
| 1511   | TUBB8       | p.F85L         | 10         | 94579     | Missense               | A                | G             | c.253T>C    | 0.04      |
| 1511   | RSU1        | p.X200_splice  | 10         | 16737156  | Splice_Site            | T                | G             | c.599-2A>C  | 0.08      |
| 1511   | SFTPA1      | p.V34A         | 10         | 81371637  | Missense               | T                | C             | c.101T>C    | 0.04      |
| 1511   | LRIT1       | p.L256P        | 10         | 85993957  | Missense               | A                | G             | c.767T>C    | 0.04      |
| 1511   | MUC5B       | p.I3478T       | 11         | 1268543   | Missense               | T                | C             | c.10433T>C  | 0.05      |
| 1511   | OR8U1       | p.M206I        | 11         | 56143717  | Missense               | G                | A             | c.618G>A    | 0.10      |
| 1511   | AHNAK       | p.T2181A       | 11         | 62295348  | Missense               | T                | C             | c.6541A>G   | 0.09      |
| 1511   | APAF1       | p.L1164F       | 12         | 99120986  | Missense               | G                | T             | c.3492G>T   | 0.45      |
| 1511   | TDG         | p.X322_splice  | 12         | 104378700 | Splice_Site            | T                | C             | c.964+2T>C  | 0.04      |
| 1511   | IRS2        | p.P780A        | 13         | 110436063 | Missense               | G                | C             | c.2338C>G   | 0.46      |
| 1511   | AHNAK2      | p.V4126M       | 14         | 105409412 | Missense               | C                | T             | c.12376G>A  | 0.04      |
| 1511   | GOLGA6B     | p.D676N        | 15         | 72958627  | Missense               | G                | A             | c.2026G>A   | 0.11      |
| 1511   | ISLR2       |                | 15         | 74422893  | Splice_Site            | A                | G             | c.-186-2A>G | 0.15      |
| 1511   | NPIP6       | p.V236A        | 16         | 28354499  | Missense               | A                | G             | c.707T>C    | 0.10      |
| 1511   | KRTAP4-11   | p.R103S        | 17         | 39274259  | Missense               | T                | G             | c.309A>C    | 0.14      |
| 1511   | STAT3       | p.N647I        | 17         | 40474461  | Missense               | T                | A             | c.1940A>T   | 0.51      |
| 1511   | ZNF257      | p.V249I        | 19         | 22271297  | Missense               | G                | A             | c.745G>A    | 0.08      |
| 1511   | ZNF283      | p.K572E        | 19         | 44352467  | Missense               | A                | G             | c.1714A>G   | 0.04      |
| 1511   | INSM1       | p.A418G        | 20         | 20350164  | Missense               | C                | G             | c.1253C>G   | 0.49      |
| 1511   | ZNF831      | p.E1061*       | 20         | 57769255  | Nonsense               | G                | T             | c.3181G>T   | 0.02      |
| 1511   | RUNX1       | p.M25I         | 21         | 36265244  | Missense               | C                | A             | c.75G>T     | 0.04      |
| 1511   | BRD1        | p.R267W        | 22         | 50217167  | Missense               | G                | A             | c.799C>T    | 0.13      |
| 1511   | MT-ND4L     | p.M9T          | MT         | 10495     | Missense               | T                | C             | c.26T>C     | 0.00      |
| 1791   | F5          | p.N1257T       | 1          | 169510558 | Missense               | T                | G             | c.3770A>C   | 0.15      |
| 1791   | CEP170      | p.S792*        | 1          | 243328887 | Nonsense               | G                | T             | c.2375C>A   | 0.04      |

| Sample | Hugo Symbol | HGVSp Short   | Chromosome | Start     | Variant Classification | Reference Allele | Tumor Allele2 | HGVSc       | tumor_vaf |
|--------|-------------|---------------|------------|-----------|------------------------|------------------|---------------|-------------|-----------|
| 1791   | RMND5A      | p.V302A       | 2          | 86997196  | Missense               | T                | C             | c.905T>C    | 0.40      |
| 1791   | POTEE       | p.V644I       | 2          | 132020958 | Missense               | G                | A             | c.1930G>A   | 0.08      |
| 1791   | TTN         | p.A13230V     | 2          | 179515498 | Missense               | G                | A             | c.39689C>T  | 0.36      |
| 1791   | FANCD2      | p.K871N       | 3          | 10114944  | Missense               | A                | C             | c.2613A>C   | 0.07      |
| 1791   | DNAH12      | p.E386G       | 3          | 57488136  | Missense               | T                | C             | c.1157A>G   | 0.03      |
| 1791   | TCTEX1D2    | p.D13A        | 3          | 196044986 | Missense               | T                | G             | c.38A>C     | 0.13      |
| 1791   | CRIPAK      | p.M48V        | 4          | 1388441   | Missense               | A                | G             | c.142A>G    | 0.11      |
| 1791   | MTHFD2L     | p.V219I       | 4          | 75067030  | Missense               | G                | A             | c.655G>A    | 0.13      |
| 1791   | WNT8A       | p.A9T         | 5          | 137419803 | Missense               | G                | A             | c.25G>A     | 0.52      |
| 1791   | RSPH10B     | p.T148M       | 7          | 6000452   | Missense               | G                | A             | c.443C>T    | 0.18      |
| 1791   | MUC17       | p.N1390T      | 7          | 100678866 | Missense               | A                | C             | c.4169A>C   | 0.14      |
| 1791   | VPS13A      | p.R2786T      | 9          | 79981674  | Missense               | G                | C             | c.8357G>C   | 0.36      |
| 1791   | NSMCE4A     | p.Q88*        | 10         | 123734419 | Nonsense               | G                | A             | c.262C>T    | 0.40      |
| 1791   | OR52L1      | p.Q42P        | 11         | 6008036   | Missense               | T                | G             | c.125A>C    | 0.04      |
| 1791   | LRFN4       | p.R367G       | 11         | 66626314  | Missense               | C                | G             | c.1099C>G   | 0.47      |
| 1791   | GOLGA8K     | p.X401_splice | 15         | 32686943  | Splice_Site            | T                | G             | c.1201-2A>C | 0.35      |
| 1791   | IGF1R       | p.R753Q       | 15         | 99465433  | Missense               | G                | A             | c.2258G>A   | 0.05      |
| 1791   | NPIP6       | p.V236A       | 16         | 28354499  | Missense               | A                | G             | c.707T>C    | 0.11      |
| 1791   | IL17C       | p.G26V        | 16         | 88705459  | Missense               | G                | T             | c.77G>T     | 0.43      |
| 1791   | STAT3       | p.K658R       | 17         | 40474428  | Missense               | T                | C             | c.1973A>G   | 0.48      |
| 1791   | SPOP        | p.M255I       | 17         | 47684684  | Missense               | C                | T             | c.765G>A    | 0.42      |
| 1791   | KDM4B       | p.V408G       | 19         | 5119771   | Missense               | T                | G             | c.1223T>G   | 0.05      |
| 1791   | RGAG1       | p.E779*       | X          | 109696180 | Nonsense               | G                | T             | c.2335G>T   | 0.05      |
| 1820   | PIK3CD      | p.E81K        | 1          | 9775698   | Missense               | G                | A             | c.241G>A    | 0.14      |
| 1820   | CROCC       | p.A440S       | 1          | 17264922  | Missense               | G                | T             | c.1318G>T   | 0.03      |
| 1820   | HSPG2       | p.R2408Q      | 1          | 22176927  | Missense               | C                | T             | c.7223G>A   | 0.08      |
| 1820   | C1orf87     | p.Q75*        | 1          | 60520995  | Nonsense               | G                | A             | c.223C>T    | 0.03      |
| 1820   | C1orf51     | p.T108S       | 1          | 150256000 | Missense               | C                | G             | c.323C>G    | 0.39      |
| 1820   | HRNR        | p.G1210R      | 1          | 152190477 | Missense               | C                | T             | c.3628G>A   | 0.29      |
| 1820   | FLG         | p.H3034Y      | 1          | 152278262 | Missense               | G                | A             | c.9100C>T   | 0.44      |
| 1820   | LRRC52      | p.G222R       | 1          | 165532783 | Missense               | G                | A             | c.664G>A    | 0.03      |
| 1820   | DNAH6       | p.G2465C      | 2          | 84921473  | Missense               | G                | T             | c.7393G>T   | 0.09      |
| 1820   | TUBA3D      | p.R221S       | 2          | 132237927 | Missense               | C                | A             | c.661C>A    | 0.11      |
| 1820   | TLL4        | p.G238D       | 2          | 219603112 | Missense               | G                | A             | c.713G>A    | 0.05      |
| 1820   | CCDC108     | p.X181_splice | 2          | 219897295 | Splice_Site            | C                | T             | c.543-1G>A  | 0.56      |
| 1820   | SLITRK3     | p.L506V       | 3          | 164907103 | Missense               | A                | C             | c.1516T>G   | 0.18      |
| 1820   | MUC4        | p.V3726A      | 3          | 195507274 | Missense               | A                | G             | c.11177T>C  | 0.20      |
| 1820   | MUC4        | p.S1591T      | 3          | 195513680 | Missense               | A                | T             | c.4771T>A   | 0.16      |
| 1820   | SOD3        | p.R232W       | 4          | 24801837  | Missense               | C                | T             | c.694C>T    | 0.48      |
| 1820   | HPSE        | p.G349R       | 4          | 84230044  | Missense               | C                | T             | c.1045G>A   | 0.39      |
| 1820   | TET2        | p.R1452*      | 4          | 106193892 | Nonsense               | C                | T             | c.4354C>T   | 0.49      |
| 1820   | SLC6A19     | p.A167T       | 5          | 1212435   | Missense               | G                | A             | c.499G>A    | 0.05      |
| 1820   | SLCO4C1     | p.Y266C       | 5          | 101606333 | Missense               | T                | C             | c.797A>G    | 0.52      |
| 1820   | PCDHA10     | p.T437M       | 5          | 140236943 | Missense               | C                | T             | c.1310C>T   | 0.03      |
| 1820   | ADAM19      | p.E698D       | 5          | 156918624 | Missense               | C                | G             | c.2094G>C   | 0.48      |
| 1820   | MDC1        | p.M1316R      | 6          | 30673013  | Missense               | A                | C             | c.3947T>G   | 0.10      |
| 1820   | DPCR1       | p.S420P       | 6          | 30917499  | Missense               | T                | C             | c.1258T>C   | 0.12      |
| 1820   | DPCR1       | p.L874P       | 6          | 30918862  | Missense               | T                | C             | c.2621T>C   | 0.16      |
| 1820   | TNXB        | p.A1860T      | 6          | 32037339  | Missense               | C                | T             | c.5578G>A   | 0.17      |
| 1820   | DNAH8       | p.P505A       | 6          | 38749054  | Missense               | C                | G             | c.1513C>G   | 0.38      |
| 1820   | POM121      | p.K391N       | 7          | 72412500  | Missense               | A                | C             | c.1173A>C   | 0.20      |
| 1820   | POM121      | p.T486S       | 7          | 72412783  | Missense               | A                | T             | c.1456A>T   | 0.08      |
| 1820   | RSBN1L      | p.H136R       | 7          | 77326193  | Missense               | A                | G             | c.407A>G    | 0.17      |
| 1820   | MUC17       | p.R2742P      | 7          | 100682922 | Missense               | G                | C             | c.8225G>C   | 0.07      |
| 1820   | PTPRZ1      | p.S487N       | 7          | 121650560 | Missense               | G                | A             | c.1460G>A   | 0.05      |
| 1820   | RP1L1       | p.L2209S      | 8          | 10464982  | Missense               | A                | G             | c.6626T>C   | 0.09      |
| 1820   | HMCN2       | p.P183S       | 9          | 133300198 | Missense               | C                | T             | c.547C>T    | 0.51      |
| 1820   | FGFR2       | p.K570N       | 10         | 123256202 | Missense               | T                | G             | c.1710A>C   | 0.10      |
| 1820   | OTOG        | p.R2062H      | 11         | 17633734  | Missense               | G                | A             | c.6185C>A   | 0.04      |
| 1820   | OR5D18      | p.N37S        | 11         | 55587215  | Missense               | A                | G             | c.110A>G    | 0.04      |
| 1820   | ARCN1       | p.G418S       | 11         | 118468432 | Missense               | G                | A             | c.1252G>A   | 0.07      |
| 1820   | FAM186A     | p.S1626P      | 12         | 50745739  | Missense               | A                | G             | c.4876T>C   | 0.23      |
| 1820   | HCFC2       | p.Y164C       | 12         | 104473240 | Missense               | A                | G             | c.491A>G    | 0.48      |

| Sample | Hugo Symbol | HGVSp Short | Chromosome | Start     | Variant Classification | Reference Allele | Tumor Allele2 | HGVSc       | tumor_vaf |
|--------|-------------|-------------|------------|-----------|------------------------|------------------|---------------|-------------|-----------|
| 1820   | MMP17       | p.E345*     | 12         | 132329727 | Nonsense               | G                | T             | c.1033G>T   | 0.18      |
| 1820   | AHNAK2      | p.L3217P    | 14         | 105412138 | Missense               | A                | G             | c.9650T>C   | 0.11      |
| 1820   | SPG21       | p.M238V     | 15         | 65257759  | Missense               | T                | C             | c.712A>G    | 0.24      |
| 1820   | SCAMP5      | p.A225T     | 15         | 75311289  | Missense               | G                | A             | c.673G>A    | 0.11      |
| 1820   | ADAMTSL3    | p.Q788H     | 15         | 84611708  | Missense               | G                | C             | c.2364G>C   | 0.22      |
| 1820   | MSLNL       | p.C161R     | 16         | 830520    | Missense               | A                | G             | c.481T>C    | 0.10      |
| 1820   | CCDC135     | p.D164A     | 16         | 57734169  | Missense               | A                | C             | c.491A>C    | 0.05      |
| 1820   | EVPLL       |             | 17         | 18291604  | Splice_Site            | T                | C             | c.*40+2T>C  | 0.04      |
| 1820   | CNTNAP1     | p.L1111H    | 17         | 40847878  | Missense               | T                | A             | c.3332T>A   | 0.21      |
| 1820   | AC012123.1  | p.D175A     | 18         | 30352227  | Missense               | A                | C             | c.524A>C    | 0.05      |
| 1820   | LOXHD1      | p.F85L      | 18         | 44125313  | Missense               | A                | G             | c.253T>C    | 0.20      |
| 1820   | DNASE2      | p.A14T      | 19         | 12992150  | Missense               | C                | T             | c.40G>A     | 0.51      |
| 1820   | ZNF729      | p.D502A     | 19         | 22497724  | Missense               | A                | C             | c.1505A>C   | 0.06      |
| 1820   | ZNF91       | p.T308A     | 19         | 23544859  | Missense               | T                | C             | c.922A>G    | 0.04      |
| 1820   | CEACAM7     | p.G70R      | 19         | 42191009  | Missense               | C                | T             | c.208G>A    | 0.04      |
| 1820   | ZNF835      | p.T307A     | 19         | 57175648  | Missense               | T                | C             | c.919A>G    | 0.08      |
| 1820   | DLGAP4      | p.V164I     | 20         | 35060610  | Missense               | G                | A             | c.490G>A    | 0.04      |
| 1820   | KRTAP10-6   | p.P45R      | 21         | 46012232  | Missense               | G                | C             | c.134C>G    | 0.16      |
| 1820   | KRTAP10-6   | p.P45T      | 21         | 46012233  | Missense               | G                | T             | c.133C>A    | 0.14      |
| 1820   | USP27X      | p.T99M      | X          | 49645206  | Missense               | C                | T             | c.296C>T    | 0.48      |
| 1820   | ACRC        | p.N172S     | X          | 70823642  | Missense               | A                | G             | c.515A>G    | 0.21      |
| 1820   | AFF2        | p.P132L     | X          | 147743643 | Missense               | C                | T             | c.395C>T    | 0.94      |
| 1856   | ROR1        | p.R117Q     | 1          | 64515549  | Missense               | G                | A             | c.350G>A    | 0.04      |
| 1856   | MSH4        | p.K435M     | 1          | 76333272  | Missense               | A                | T             | c.1304A>T   | 0.03      |
| 1856   | IFI44L      | p.R157*     | 1          | 79094069  | Nonsense               | C                | T             | c.469C>T    | 0.36      |
| 1856   | TCHH        | p.E501V     | 1          | 152084191 | Missense               | T                | A             | c.1502A>T   | 0.08      |
| 1856   | TCHH        | p.E501Q     | 1          | 152084192 | Missense               | C                | G             | c.1501G>C   | 0.08      |
| 1856   | FLG         | p.S3662T    | 1          | 152276377 | Missense               | C                | G             | c.10985G>C  | 0.06      |
| 1856   | FLG2        | p.S650G     | 1          | 152328314 | Missense               | T                | C             | c.1948A>G   | 0.09      |
| 1856   | ASTN1       | p.E418G     | 1          | 176993736 | Missense               | T                | C             | c.1253A>G   | 0.04      |
| 1856   | BRINP3      | p.A369V     | 1          | 190129876 | Missense               | G                | A             | c.1106C>T   | 0.40      |
| 1856   | IGFN1       | p.K1563E    | 1          | 201178708 | Missense               | A                | G             | c.4687A>G   | 0.11      |
| 1856   | ANKRD36     | p.T1018S    | 2          | 97869991  | Missense               | A                | T             | c.3052A>T   | 0.02      |
| 1856   | BAZ2B       | p.K1057T    | 2          | 160245902 | Missense               | T                | G             | c.3170A>C   | 0.03      |
| 1856   | ANO7        | p.E880D     | 2          | 242163142 | Missense               | G                | T             | c.2640G>T   | 0.04      |
| 1856   | SETMAR      | p.N504T     | 3          | 4358386   | Missense               | A                | C             | c.1511A>C   | 0.32      |
| 1856   | ZSWIM6      | p.P946S     | 5          | 60839332  | Missense               | C                | T             | c.2836C>T   | 0.39      |
| 1856   | BDP1        | p.Q1115E    | 5          | 70806262  | Missense               | C                | G             | c.3343C>G   | 0.08      |
| 1856   | KCNMB1      | p.V146I     | 5          | 169805848 | Missense               | C                | T             | c.436G>A    | 0.39      |
| 1856   | PXDNL       | p.S585C     | 8          | 52336176  | Missense               | G                | C             | c.1754C>G   | 0.44      |
| 1856   | CD274       | p.G245R     | 9          | 5465549   | Missense               | G                | A             | c.733G>A    | 0.03      |
| 1856   | SGMS1       | p.G250R     | 10         | 52071169  | Missense               | C                | T             | c.748G>A    | 0.25      |
| 1856   | SFTPA1      | p.V34A      | 10         | 81371637  | Missense               | T                | C             | c.101T>C    | 0.06      |
| 1856   | HELLS       | p.L645V     | 10         | 96352233  | Missense               | C                | G             | c.1933C>G   | 0.35      |
| 1856   | API5        | p.S199C     | 11         | 43345032  | Missense               | C                | G             | c.596C>G    | 0.28      |
| 1856   | ALX4        | p.V241M     | 11         | 44296954  | Missense               | C                | T             | c.721G>A    | 0.05      |
| 1856   | MS4A6A      | p.E56K      | 11         | 59949119  | Missense               | C                | T             | c.166G>A    | 0.03      |
| 1856   | AHNAK       | p.L2567F    | 11         | 62294188  | Missense               | T                | G             | c.7701A>C   | 0.08      |
| 1856   | TENM4       | p.M1673V    | 11         | 78412641  | Missense               | T                | C             | c.5017A>G   | 0.22      |
| 1856   | SLCO1B1     | p.G394R     | 12         | 21355469  | Missense               | G                | A             | c.1180G>A   | 0.27      |
| 1856   | MUC19       | p.N3605D    | 12         | 40879268  | Missense               | A                | G             | c.10813A>G  | 0.09      |
| 1856   | FAM186A     | p.K1258Q    | 12         | 50746843  | Missense               | T                | G             | c.3772A>C   | 0.13      |
| 1856   | KRT75       | p.I214T     | 12         | 52826894  | Missense               | A                | G             | c.641T>C    | 0.16      |
| 1856   | LHX5        | p.P183L     | 12         | 113906059 | Missense               | G                | A             | c.548C>T    | 0.29      |
| 1856   | PPP1R3E     |             | 14         | 23770505  | Splice_Site            | A                | C             | c.*138+2T>G | 0.16      |
| 1856   | ZFH2        | p.A276T     | 14         | 24003709  | Missense               | C                | T             | c.826G>A    | 0.22      |
| 1856   | ZWILCH      | p.W546R     | 15         | 66832497  | Missense               | T                | C             | c.1636T>C   | 0.30      |
| 1856   | CCL22       | p.L45Q      | 16         | 57394409  | Missense               | T                | A             | c.134T>A    | 0.31      |
| 1856   | ZNF207      | p.T337A     | 17         | 30694878  | Missense               | A                | G             | c.1009A>G   | 0.24      |
| 1856   | KRT31       | p.S15N      | 17         | 39553748  | Missense               | C                | T             | c.44G>A     | 0.05      |
| 1856   | DNM2        | p.V234M     | 19         | 10893647  | Missense               | G                | A             | c.700G>A    | 0.28      |
| 1856   | ZNF676      | p.I525R     | 19         | 22362945  | Missense               | A                | C             | c.1574T>G   | 0.07      |
| 1856   | GPATCH1     | p.D904H     | 19         | 33617584  | Missense               | G                | C             | c.2710G>C   | 0.25      |

| Sample | Hugo Symbol | HGVSp Short | Chromosome | Start     | Variant Classification | Reference Allele | Tumor Allele2 | HGVSc      | tumor_vaf |
|--------|-------------|-------------|------------|-----------|------------------------|------------------|---------------|------------|-----------|
| 1856   | FCGBP       | p.R2925W    | 19         | 40386541  | Missense               | G                | A             | c.8773C>T  | 0.09      |
| 1856   | ZNF845      | p.L522P     | 19         | 53855493  | Missense               | T                | C             | c.1565T>C  | 0.06      |
| 1856   | ZNF71       | p.A423S     | 19         | 57133922  | Missense               | G                | T             | c.1267G>T  | 0.05      |
| 1856   | ZNF586      | p.I181S     | 19         | 58290497  | Missense               | T                | G             | c.542T>G   | 0.10      |
| 1856   | ZNF814      | p.D404E     | 19         | 58385546  | Missense               | G                | T             | c.1212C>A  | 0.11      |
| 1856   | PIGU        | p.P214A     | 20         | 33176399  | Missense               | G                | C             | c.640C>G   | 0.03      |
| 1856   | SLC7A4      | p.L597M     | 22         | 21383463  | Missense               | G                | T             | c.1789C>A  | 0.21      |
| 1856   | TBL1X       | p.K455N     | X          | 9677726   | Missense               | A                | C             | c.1365A>C  | 0.05      |
| 1856   | RBMXL3      | p.N405D     | X          | 114425217 | Missense               | A                | G             | c.1213A>G  | 0.03      |
| 1862   | NBPF1       | p.H567R     | 1          | 16905789  | Missense               | T                | C             | c.1700A>G  | 0.03      |
| 1862   | NBPF1       | p.F314S     | 1          | 16912031  | Missense               | A                | G             | c.941T>C   | 0.05      |
| 1862   | COL24A1     | p.G774E     | 1          | 86453327  | Missense               | C                | T             | c.2321G>A  | 0.48      |
| 1862   | COL11A1     | p.G1522S    | 1          | 103354177 | Missense               | C                | T             | c.4564G>A  | 0.03      |
| 1862   | RAP1A       | p.C48G      | 1          | 112240078 | Missense               | T                | G             | c.142T>G   | 0.42      |
| 1862   | NBPF10      | p.P26S      | 1          | 145293481 | Missense               | C                | T             | c.76C>T    | 0.18      |
| 1862   | PRUNE       | p.Q423*     | 1          | 151006615 | Nonsense               | C                | T             | c.1267C>T  | 0.40      |
| 1862   | OBSCN       | p.R5973Q    | 1          | 228509589 | Missense               | G                | A             | c.17918G>A | 0.44      |
| 1862   | PCNXL2      | p.Q1398K    | 1          | 233190173 | Missense               | G                | T             | c.4192C>A  | 0.49      |
| 1862   | CEP170      | p.T684K     | 1          | 243329211 | Missense               | G                | T             | c.2051C>A  | 0.04      |
| 1862   | OR2T12      | p.E230*     | 1          | 248458193 | Nonsense               | C                | A             | c.688G>T   | 0.51      |
| 1862   | PLB1        | p.S290A     | 2          | 28764667  | Missense               | T                | G             | c.868T>G   | 0.07      |
| 1862   | NLRC4       | p.S742N     | 2          | 32474708  | Missense               | C                | T             | c.2225G>A  | 0.37      |
| 1862   | PLEKHH2     | p.V315A     | 2          | 43927041  | Missense               | T                | C             | c.944G>C   | 0.48      |
| 1862   | NOTO        | p.F175S     | 2          | 73435669  | Missense               | T                | C             | c.524T>C   | 0.04      |
| 1862   | TUBA3D      | p.R221S     | 2          | 132237927 | Missense               | C                | A             | c.661C>A   | 0.05      |
| 1862   | NCKAP5      | p.P909H     | 2          | 133541658 | Missense               | G                | T             | c.2726C>A  | 0.34      |
| 1862   | ITGAV       | p.T978N     | 2          | 187541544 | Missense               | C                | A             | c.2933C>A  | 0.09      |
| 1862   | FN1         | p.S708R     | 2          | 216274461 | Missense               | G                | T             | c.2124C>A  | 0.45      |
| 1862   | ECEL1       | p.A31D      | 2          | 233351272 | Missense               | G                | T             | c.92C>A    | 0.39      |
| 1862   | GRM7        | p.P569L     | 3          | 7620299   | Missense               | C                | T             | c.1706C>T  | 0.85      |
| 1862   | LHFPL4      | p.S4L       | 3          | 9594353   | Missense               | G                | A             | c.11C>T    | 0.10      |
| 1862   | STAB1       | p.F1362L    | 3          | 52550194  | Missense               | T                | C             | c.4084T>C  | 0.38      |
| 1862   | ADCY5       | p.P22L      | 3          | 123167328 | Missense               | G                | A             | c.65C>T    | 0.45      |
| 1862   | EIF4A2      | p.T219S     | 3          | 186504319 | Missense               | C                | G             | c.656C>G   | 0.66      |
| 1862   | MUC4        | p.H3490P    | 3          | 195507982 | Missense               | T                | G             | c.10469A>C | 0.15      |
| 1862   | ZNF732      | p.S382R     | 4          | 265500    | Missense               | A                | T             | c.1146T>A  | 0.09      |
| 1862   | PTTG2       | p.I148F     | 4          | 37962497  | Missense               | A                | T             | c.442A>T   | 0.49      |
| 1862   | ATOH1       | p.R96W      | 4          | 94750363  | Missense               | C                | T             | c.286C>T   | 0.30      |
| 1862   | BBS12       | p.Q75K      | 4          | 123663270 | Missense               | C                | A             | c.223C>A   | 0.07      |
| 1862   | DCHS2       | p.E2262Q    | 4          | 155157655 | Missense               | C                | G             | c.6784G>C  | 0.53      |
| 1862   | CAST        | p.P134L     | 5          | 96065404  | Missense               | C                | T             | c.401C>T   | 0.51      |
| 1862   | AFAP1L1     | p.G355S     | 5          | 148695426 | Missense               | G                | A             | c.1063G>A  | 0.35      |
| 1862   | DPCR1       | p.L318P     | 6          | 30917194  | Missense               | T                | C             | c.953T>C   | 0.14      |
| 1862   | MUC22       | p.I361T     | 6          | 30994290  | Missense               | T                | C             | c.1082T>C  | 0.09      |
| 1862   | MUC22       | p.I610T     | 6          | 30995037  | Missense               | T                | C             | c.1829T>C  | 0.09      |
| 1862   | PRRC2A      | p.N21S      | 6          | 31590628  | Missense               | A                | G             | c.62A>G    | 0.03      |
| 1862   | CYP21A2     | p.A435V     | 6          | 32008727  | Missense               | C                | T             | c.1304C>T  | 0.09      |
| 1862   | MDGA1       | p.E807K     | 6          | 37611702  | Missense               | C                | T             | c.2419G>A  | 0.53      |
| 1862   | BAI3        | p.R588*     | 6          | 69703687  | Nonsense               | C                | T             | c.1762C>T  | 0.50      |
| 1862   | CTAGE9      | p.K379N     | 6          | 132031021 | Missense               | C                | A             | c.1137G>T  | 0.44      |
| 1862   | FGL2        | p.P40L      | 7          | 76828992  | Missense               | G                | A             | c.119C>T   | 0.51      |
| 1862   | MUC12       | p.R363S     | 7          | 100634933 | Missense               | G                | C             | c.1089G>C  | 0.09      |
| 1862   | MUC17       | p.N2194T    | 7          | 100681278 | Missense               | A                | C             | c.6581A>C  | 0.09      |
| 1862   | RASA4B      | p.H677R     | 7          | 102125543 | Missense               | T                | C             | c.2030A>G  | 0.10      |
| 1862   | SMO         | p.V240I     | 7          | 128845224 | Missense               | G                | A             | c.718G>A   | 0.46      |
| 1862   | CTAGE8      | p.R655G     | 7          | 143964381 | Missense               | T                | C             | c.1963A>G  | 0.08      |
| 1862   | ZFHx4       | p.T2041P    | 8          | 77765278  | Missense               | A                | C             | c.6121A>C  | 0.16      |
| 1862   | HHLA1       | p.R445T     | 8          | 133088736 | Missense               | C                | G             | c.1334G>C  | 0.41      |
| 1862   | RLN2        | p.S75F      | 9          | 5300432   | Missense               | G                | A             | c.224C>T   | 0.43      |
| 1862   | ZNF658      | p.V815A     | 9          | 40772831  | Missense               | A                | G             | c.2444T>C  | 0.04      |
| 1862   | FAM171A1    | p.G28C      | 10         | 15412970  | Missense               | C                | A             | c.82G>T    | 0.50      |
| 1862   | SFTPA1      | p.V34A      | 10         | 81371637  | Missense               | T                | C             | c.101T>C   | 0.06      |
| 1862   | ANO3        | p.A638T     | 11         | 26655789  | Missense               | G                | A             | c.1912C>A  | 0.21      |

| Sample | Hugo Symbol | HGVSp Short   | Chromosome | Start     | Variant Classification | Reference Allele | Tumor Allele2 | HGVSc       | tumor_vaf |
|--------|-------------|---------------|------------|-----------|------------------------|------------------|---------------|-------------|-----------|
| 1862   | GLYATL1     | p.N7Y         | 11         | 58710790  | Missense               | A                | T             | c.19A>T     | 0.05      |
| 1862   | AHNAK       | p.L2567F      | 11         | 62294188  | Missense               | T                | G             | c.7701A>C   | 0.11      |
| 1862   | OTUB1       | p.K201R       | 11         | 63764700  | Missense               | A                | G             | c.602A>G    | 0.04      |
| 1862   | PDE2A       | p.D580N       | 11         | 72293601  | Missense               | C                | T             | c.1738G>A   | 0.42      |
| 1862   | RAB6A       | p.R169C       | 11         | 73390756  | Missense               | G                | A             | c.505C>T    | 0.08      |
| 1862   | FAT3        | p.R2731K      | 11         | 92534371  | Missense               | G                | A             | c.8192G>A   | 0.43      |
| 1862   | KIAA1377    | p.C1113Y      | 11         | 101868358 | Missense               | G                | A             | c.3338G>A   | 0.47      |
| 1862   | PHC1        | p.A418D       | 12         | 9085306   | Missense               | C                | A             | c.1253C>A   | 0.16      |
| 1862   | PKP2        | p.G175R       | 12         | 33031291  | Missense               | C                | T             | c.523G>A    | 0.45      |
| 1862   | KRT75       | p.V104F       | 12         | 52827779  | Missense               | C                | A             | c.310G>T    | 0.45      |
| 1862   | PSPC1       | p.M437V       | 13         | 20279879  | Missense               | T                | C             | c.1309A>G   | 0.06      |
| 1862   | PCDH17      | p.P46S        | 13         | 58206816  | Missense               | C                | T             | c.136C>T    | 0.47      |
| 1862   | FOXA1       | p.G315R       | 14         | 38061046  | Missense               | C                | T             | c.943G>A    | 0.43      |
| 1862   | ACTN1       | p.S348R       | 14         | 69358812  | Missense               | G                | C             | c.1044C>G   | 0.45      |
| 1862   | TRIP11      | p.K343N       | 14         | 92480716  | Missense               | C                | A             | c.1029G>T   | 0.42      |
| 1862   | DDX24       | p.K527R       | 14         | 94526777  | Missense               | T                | C             | c.1580A>G   | 0.54      |
| 1862   | RTL1        | p.E477D       | 14         | 101349695 | Missense               | C                | A             | c.1431G>T   | 0.43      |
| 1862   | C14orf144   | p.G9S         | 14         | 104710642 | Missense               | G                | A             | c.25G>A     | 0.39      |
| 1862   | AHNAK2      | p.V3209L      | 14         | 105412163 | Missense               | C                | G             | c.9625G>C   | 0.10      |
| 1862   | AHNAK2      | p.M2119V      | 14         | 105415433 | Missense               | T                | C             | c.6355A>G   | 0.13      |
| 1862   | AHNAK2      | p.T720A       | 14         | 105419630 | Missense               | T                | C             | c.2158A>G   | 0.06      |
| 1862   | BTBD6       | p.P47S        | 14         | 105715346 | Missense               | C                | T             | c.139C>T    | 0.36      |
| 1862   | CHD2        | p.E287K       | 15         | 93486105  | Missense               | G                | A             | c.859G>A    | 0.51      |
| 1862   | NOMO1       | p.X557_splice | 16         | 14959013  | Splice_Site            | G                | A             | c.1669+1G>A | 0.06      |
| 1862   | NQO1        | p.D245N       | 16         | 69744971  | Missense               | C                | T             | c.733G>A    | 0.54      |
| 1862   | RTN4RL1     | p.E103Q       | 17         | 1840809   | Missense               | C                | G             | c.307G>C    | 0.51      |
| 1862   | CDRT1       | p.I23N        | 17         | 15522759  | Missense               | A                | T             | c.68T>A     | 0.05      |
| 1862   | KRTAP9-9    | p.L67V        | 17         | 39411836  | Missense               | C                | G             | c.199C>G    | 0.06      |
| 1862   | ADAM11      | p.R63Q        | 17         | 42837216  | Missense               | G                | A             | c.188G>A    | 0.49      |
| 1862   | MPO         | p.R511H       | 17         | 56350864  | Missense               | C                | T             | c.1532G>A   | 0.45      |
| 1862   | SDK2        | p.V1391A      | 17         | 71386446  | Missense               | A                | G             | c.4172G>C   | 0.16      |
| 1862   | TXNDC2      | p.L299I       | 18         | 9887371   | Missense               | C                | A             | c.895C>A    | 0.11      |
| 1862   | ZBTB7A      | p.Q165*       | 19         | 4054738   | Nonsense               | G                | A             | c.493C>T    | 0.38      |
| 1862   | PLIN4       | p.G329S       | 19         | 4512945   | Missense               | C                | T             | c.985G>A    | 0.09      |
| 1862   | ZNF100      | p.D460E       | 19         | 21909734  | Missense               | G                | T             | c.1380C>A   | 0.04      |
| 1862   | ZNF43       | p.S694T       | 19         | 21990759  | Missense               | A                | T             | c.2080T>A   | 0.07      |
| 1862   | ZNF730      | p.N356T       | 19         | 23328913  | Missense               | A                | C             | c.1067A>C   | 0.09      |
| 1862   | RHPN2       | p.Q384R       | 19         | 33490566  | Missense               | T                | C             | c.1151A>G   | 0.06      |
| 1862   | ZNF234      | p.K412R       | 19         | 44661404  | Missense               | A                | G             | c.1235A>G   | 0.45      |
| 1862   | FCAR        | p.A51D        | 19         | 55396728  | Missense               | C                | A             | c.152C>A    | 0.53      |
| 1862   | C20orf194   | p.A261T       | 20         | 3329180   | Missense               | C                | T             | c.781G>A    | 0.48      |
| 1862   | JPH2        | p.M292T       | 20         | 42788552  | Missense               | A                | G             | c.875T>C    | 0.13      |
| 1862   | IL10RB      | p.S77P        | 21         | 34648956  | Missense               | T                | C             | c.229T>C    | 0.03      |
| 1862   | TRPM2       | p.T1298M      | 21         | 45846913  | Missense               | C                | T             | c.3893C>T   | 0.49      |
| 1862   | KRTAP10-4   | p.L97P        | 21         | 45993925  | Missense               | T                | C             | c.290T>C    | 0.12      |
| 1862   | ARVCF       | p.R609W       | 22         | 19964983  | Missense               | G                | A             | c.1825C>T   | 0.21      |
| 1862   | CCDC157     | p.V116A       | 22         | 30765519  | Missense               | T                | C             | c.347T>C    | 0.09      |
| 1866   | AGRN        | p.H625P       | 1          | 979278    | Missense               | A                | C             | c.1874A>C   | 0.14      |
| 1866   | FMO5        | p.M1?         | 1          | 146696621 | Trans_Start            | T                | C             | c.1A>G      | 0.04      |
| 1866   | LCE3C       | p.R86H        | 1          | 152573464 | Missense               | G                | A             | c.257G>A    | 0.20      |
| 1866   | PRG4        | p.G809E       | 1          | 186277277 | Missense               | G                | A             | c.2426G>A   | 0.07      |
| 1866   | LMOD1       | p.S194R       | 1          | 201869559 | Missense               | A                | C             | c.582T>G    | 0.12      |
| 1866   | TGOLN2      | p.S95P        | 2          | 8554572   | Missense               | A                | G             | c.283T>C    | 0.10      |
| 1866   | AC017081.1  | p.L90P        | 2          | 207220731 | Missense               | T                | C             | c.269T>C    | 0.08      |
| 1866   | COL6A5      | p.V1867G      | 3          | 130150660 | Missense               | T                | G             | c.5600T>G   | 0.08      |
| 1866   | MUC4        | p.L4057S      | 3          | 195506281 | Missense               | A                | G             | c.12170T>C  | 0.20      |
| 1866   | MUC4        | p.L4057V      | 3          | 195506282 | Missense               | A                | C             | c.12169T>G  | 0.31      |
| 1866   | TTC37       | p.*1565Qext*6 | 5          | 94800313  | Nonstop                | A                | G             | c.4693T>C   | 0.03      |
| 1866   | MDC1        | p.N1274S      | 6          | 30673139  | Missense               | T                | C             | c.3821A>G   | 0.10      |
| 1866   | MDGA1       | p.E188D       | 6          | 37623491  | Missense               | C                | A             | c.564G>T    | 0.42      |
| 1866   | PTPRK       | p.A345T       | 6          | 128505706 | Missense               | C                | T             | c.1033G>A   | 0.11      |
| 1866   | TXLNB       | p.Q616P       | 6          | 139563871 | Missense               | T                | G             | c.1847A>C   | 0.18      |
| 1866   | SP8         | p.Y143S       | 7          | 20825008  | Missense               | T                | G             | c.428A>C    | 0.13      |

| Sample | Hugo Symbol | HGVSp Short | Chromosome | Start     | Variant Classification | Reference Allele | Tumor Allele2 | HGVSc      | tumor_vaf |
|--------|-------------|-------------|------------|-----------|------------------------|------------------|---------------|------------|-----------|
| 1866   | ABCA13      | p.P1484R    | 7          | 48313714  | Missense               | C                | G             | c.4451C>G  | 0.08      |
| 1866   | MUC17       | p.R2742P    | 7          | 100682922 | Missense               | G                | C             | c.8225G>C  | 0.06      |
| 1866   | MUC17       | p.V3416A    | 7          | 100684944 | Missense               | T                | C             | c.10247T>C | 0.11      |
| 1866   | GATA4       | p.R259C     | 8          | 11606586  | Missense               | C                | T             | c.775C>T   | 0.43      |
| 1866   | SPATC1      | p.T327P     | 8          | 145095681 | Missense               | A                | C             | c.979A>C   | 0.26      |
| 1866   | CNTRL       | p.W2012G    | 9          | 123930563 | Missense               | T                | G             | c.6034T>G  | 0.05      |
| 1866   | ENG         | p.A367S     | 9          | 130586618 | Missense               | C                | A             | c.1099G>T  | 0.07      |
| 1866   | HKDC1       | p.A839T     | 10         | 71025483  | Missense               | G                | A             | c.2515G>A  | 0.25      |
| 1866   | ADAMTS14    | p.C152G     | 10         | 72434683  | Missense               | T                | G             | c.454T>G   | 0.06      |
| 1866   | PIK3AP1     | p.S718N     | 10         | 98369486  | Missense               | C                | T             | c.2153G>A  | 0.39      |
| 1866   | FOXM1       | p.V217G     | 12         | 2981266   | Missense               | A                | C             | c.650T>G   | 0.04      |
| 1866   | NAV3        | p.T1197A    | 12         | 78513565  | Missense               | A                | G             | c.3589A>G  | 0.35      |
| 1866   | DYNC1H1     | p.P1104L    | 14         | 102461164 | Missense               | C                | T             | c.3311C>T  | 0.07      |
| 1866   | MYO5C       | p.M603V     | 15         | 52539729  | Missense               | T                | C             | c.1807A>G  | 0.31      |
| 1866   | INO80E      | p.R160Q     | 16         | 30012817  | Missense               | G                | A             | c.479G>A   | 0.37      |
| 1866   | MYO15A      | p.R1835C    | 17         | 18044429  | Missense               | C                | T             | c.5503C>T  | 0.39      |
| 1866   | UBBP4       | p.L149R     | 17         | 21731144  | Missense               | T                | G             | c.446T>G   | 0.10      |
| 1866   | KRTAP4-7    | p.S57P      | 17         | 39240627  | Missense               | T                | C             | c.169T>C   | 0.08      |
| 1866   | USH1G       | p.G65D      | 17         | 72916737  | Missense               | C                | T             | c.194G>A   | 0.38      |
| 1866   | MED16       | p.H449Q     | 19         | 879943    | Missense               | G                | C             | c.1347C>G  | 0.06      |
| 1866   | WDR18       | p.K341E     | 19         | 992044    | Missense               | A                | G             | c.1021A>G  | 0.05      |
| 1866   | ZNF626      | p.I495T     | 19         | 20807199  | Missense               | A                | G             | c.1484T>C  | 0.14      |
| 1866   | ZNF257      | p.T222I     | 19         | 22271217  | Missense               | C                | T             | c.665C>T   | 0.06      |
| 1866   | NPHS1       | p.F973V     | 19         | 36330408  | Missense               | A                | C             | c.2917T>G  | 0.06      |
| 1866   | RYR1        | p.F4076C    | 19         | 39039005  | Missense               | T                | G             | c.12227T>G | 0.04      |
| 1866   | FAM155B     | p.H402P     | X          | 68749585  | Missense               | A                | C             | c.1205A>C  | 0.10      |
| 1866   | CAPN6       | p.T472A     | X          | 110491867 | Missense               | T                | C             | c.1414A>G  | 0.05      |
| 1866   | TENM1       | p.C784S     | X          | 123695604 | Missense               | C                | G             | c.2351G>C  | 0.33      |
| 1866   | GPC4        | p.A23V      | X          | 132548926 | Missense               | G                | A             | c.68C>T    | 0.41      |
| 1866   | SPANXN2     | p.P156S     | X          | 142795212 | Missense               | G                | A             | c.466C>T   | 0.07      |

|         |        |         |               |              |
|---------|--------|---------|---------------|--------------|
| ABL1    | DOK3   | NCSTN   | SOCS1         | <u>SF3B1</u> |
| BAD     | EIF2B2 | PIK3AP1 | SOD3          | <u>ASXL1</u> |
| BRD1    | FOXA1  | PIK3CD  | STAT3         |              |
| CCDC108 | GATA4  | PKP2    | TENM1         |              |
| CCND1   | HPSE   | PNKP    | TET2          |              |
| COL24A1 | IFI44L | PTPRK   | TNFAIP3       |              |
| COL6A6  | IRS2   | RBMXL3  | TYRP1         |              |
| CSMD1   | MDC1   | RUNX1   | ZFHX3         |              |
| DNASE2  | MPO    | SGMS1   | ZWILCH        |              |
| DNM2    | NCKAP5 | SMO     | <u>STAT5B</u> |              |

### Supplemental Table 3. A limited resequencing panel of genes found to be mutated in the WGS

**samples.** We first generated a list of somatic calls like those from Mutect2 in Supplemental Table 2 and other iterations of Mutect and Strelka from all WGS samples. We prioritized these genes based on their known role in other hematological disorders and leukemia. This analysis revealed 39 genes with functions consistent with a plausible role in the etiology of the disease. We added three genes of interest, underlined above, that had not been found to be mutated in the discovery cohort. Signal transducer and activator of transcription 5B (*STAT5B*) mutations, particularly N642H, have been shown to occur in aggressive NK-LGL leukemia.<sup>4</sup> *ASXL1* and *SF3B1* have been shown to be frequently mutated in myelodysplastic syndromes.<sup>5,6</sup> We included these genes as indicators that these other conditions may be present, but none of the samples used in this study showed mutations in these three genes. All exons plus a 5 basepair pad to include splice sites were targeted in the resequencing panel.



# Supplemental Table 4: Assessment of TET2 Mutation Pathogenicity

Each line in the table represents a TET2 mutation in a patient; some patients harbored more than one TET2 mutation. The ACMG/ASH RefSeq transcript NM\_001127208.3 was used for this analysis. The ACMG assessment of pathogenicity for each mutation is listed in the last column.

Abbreviations: ACMG=American College of Medical Genetics, del=deletion, delins=deletion-insertion, VAF=variant allele frequency, VUS=variant of unknown significance

| Patient ID | VAF | gDNA                               | cDNA                | protein       | ACMG assessment of pathogenicity |
|------------|-----|------------------------------------|---------------------|---------------|----------------------------------|
| 1001       | 5%  | chr4:g.106193872A>T                | c.4334A>T           | p.Q1445L      | VUS                              |
| 1001       | 9%  | chr4:g.106164041G>A                | c.3551G>A           | p.G1184D      | Likely Pathogenic                |
| 1166       | 43% | chr4:g.106164882_106164883dup      | c.3750_3751dup      | p.T1251Rfs*3  | Pathogenic                       |
| 1257       | 25% | chr4:g.106197246G>A                | c.5579G>A           | p.G1860E      | VUS                              |
| 1429       | 33% | chr4:g.106158500_106158501del      | c.3401_3402del      | p.R1134Mfs*7  | Likely Pathogenic                |
| 1429       | 40% | chr4:g.106156747C>T                | c.1648C>T           | p.R550*       | Pathogenic                       |
| 1444       | 41% | chr4:g.106196234C>T                | c.4567C>T           | p.Q1523*      | Pathogenic                       |
| 1444       | 42% | chr4:g.106158411_106158415del      | c.3312_3316del      | p.F1104Lfs*24 | Pathogenic                       |
| 1444       | 5%  | chr4:g.106157788del                | c.2689del           | p.Q897Rfs*24  | Pathogenic                       |
| 1506       | 29% | chr4:g.106197413_106197415del      | c.5746_5748del      | p.L1916delL   | VUS                              |
| 1507       | 33% | chr4:g.106157389del                | c.2290del           | p.Q764Kfs*49  | Pathogenic                       |
| 1511       | 11% | chr4:g.106158416_106158417del      | c.3317_3318del      | p.E1106Vfs*23 | Pathogenic                       |
| 1511       | 15% | chr4:g.106190905G>T                | c.4182+1G>T         | .             | Pathogenic                       |
| 1612       | 28% | chr4:g.106180784dup                | c.3812dup           | p.C1271Wfs*29 | Pathogenic                       |
| 1644       | 28% | chr4:g.106157255del                | c.2156del           | p.L719Cfs*32  | Likely Pathogenic                |
| 1644       | 28% | chr4:g.106182986_106182998del      | c.4025_4037del      | p.P1342Lfs*17 | Pathogenic                       |
| 1820       | 22% | chr4:g.106193892C>T                | c.4354C>T           | p.R1452*      | Pathogenic                       |
| 1870       | 12% | chr4:g.106197282T>G                | c.5615T>G           | p.L1872R      | VUS                              |
| 1909       | 29% | chr4:g.106196565_106196566delinsAA | c.4898_4899delinsAA | p.C1633*      | Pathogenic                       |
| 1967       | 38% | chr4:g.106158137del                | c.3038del           | p.P1013Lfs*20 | Pathogenic                       |
| 1967       | 43% | chr4:g.106164934G>T                | c.3802G>T           | p.E1268*      | Pathogenic                       |
| 2010       | 14% | chr4:g.106157257C>T                | c.2158C>T           | p.Q720*       | Pathogenic                       |
| 2069       | 4%  | chr4:g.106157540_106157541del      | c.2441_2442del      | p.R814Qfs*6   | Likely Pathogenic                |

# Supplemental Figure 1: (1/2) Sanger Sequencing of TET2 after CD94 isolation.

Patient PBMCs were separated into CD94+ and CD94- fractions. DNA was then extracted and samples were prepared for sequencing as described in the Supplementary Methods. Mutation labels indicate sample ID followed by the mutation being measured.

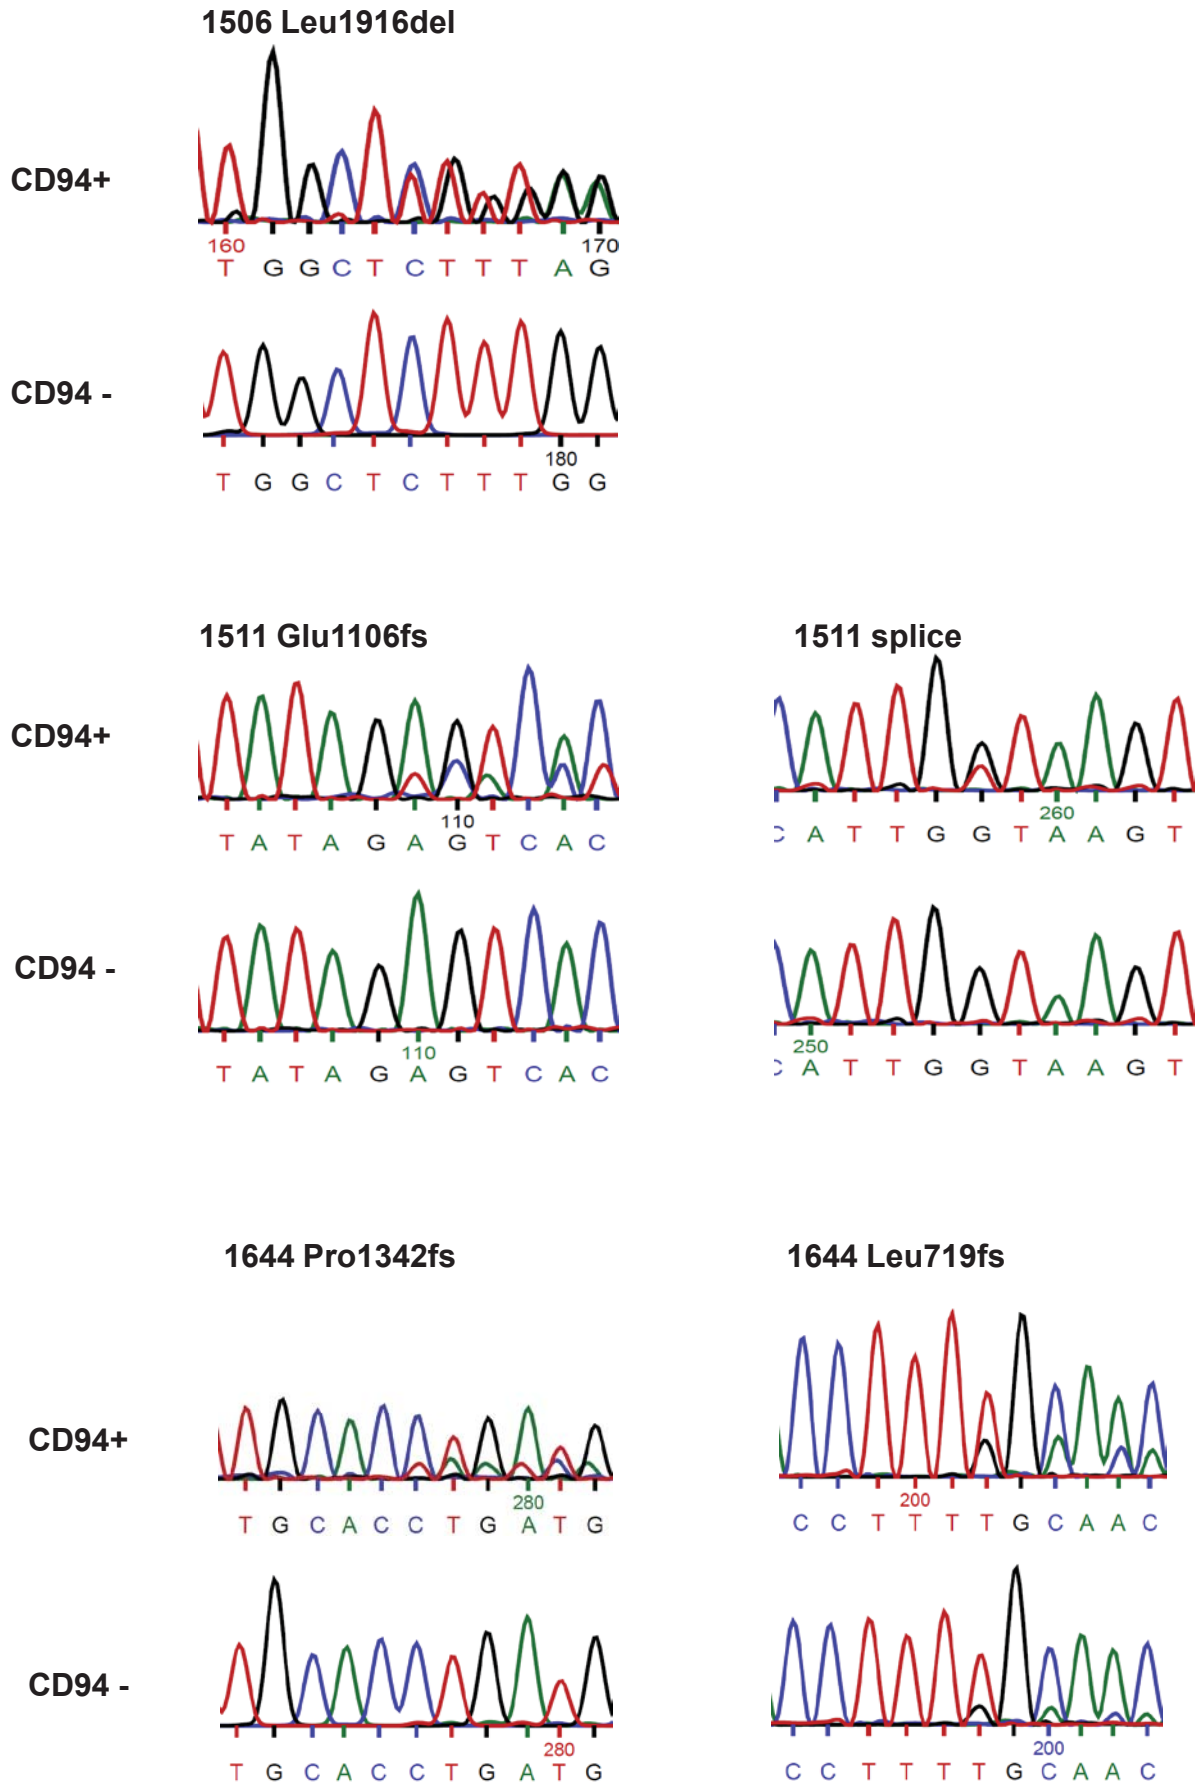

# Supplemental Figure 1: (2/2) Sanger Sequencing of TET2 after CD94 isolation.

Patient PBMCs were separated into CD94+ and CD94- fractions. DNA was then extracted and samples were prepared for sequencing as described in the Supplementary Methods. Mutation labels indicate sample ID followed by the mutation being measured.

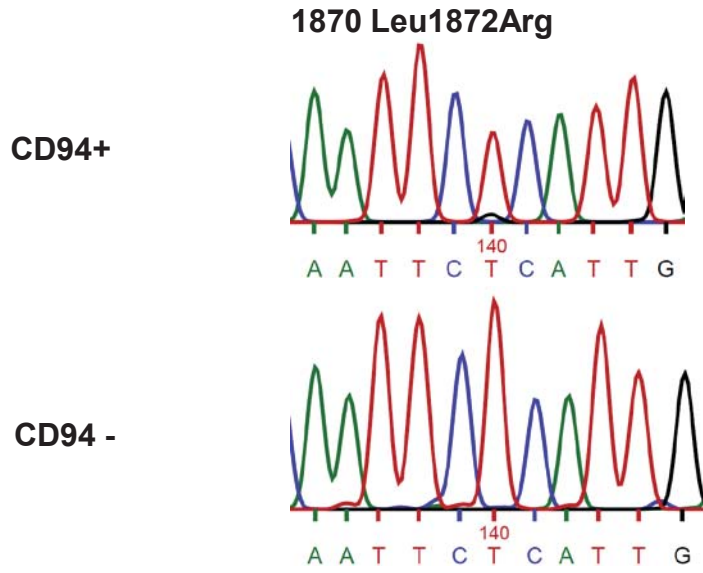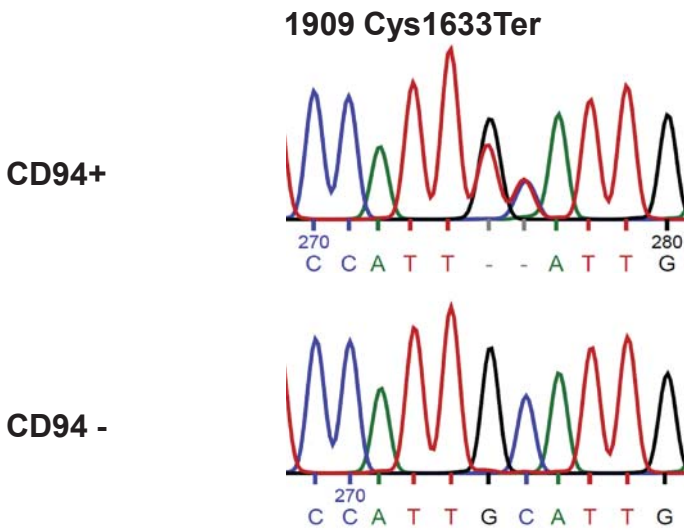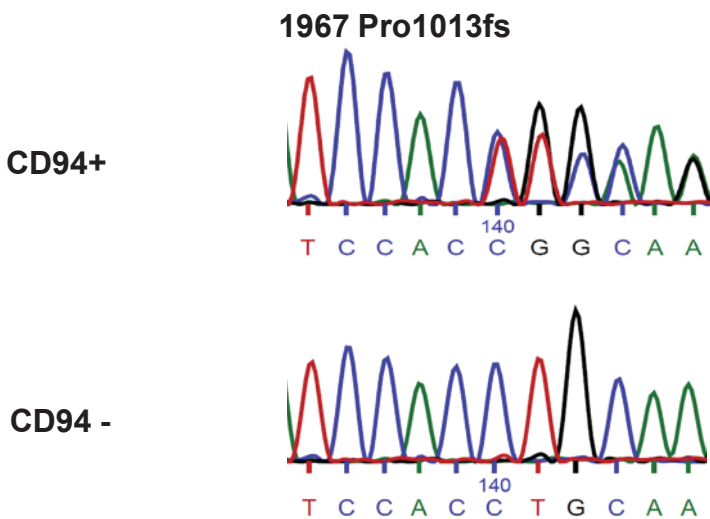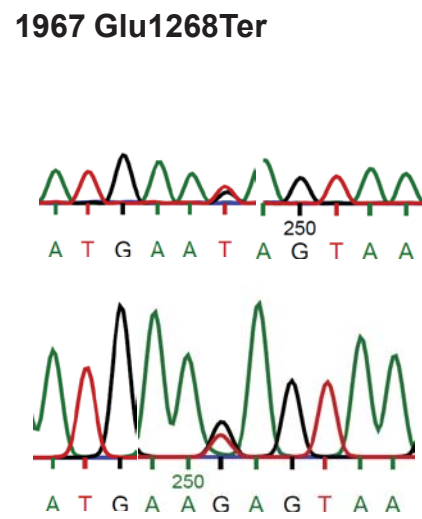

# Supplemental Figure 2: Copy Number Variation

Two WGS samples that displayed copy number variation are shown with chromosome number indicated. Regions shown in red and dark red represent amplification event with 4 copies and high level amplification with > 4 copies, respectively. Regions shown in blue and dark blue represent heterozygous and homozygous deletion, respectively.

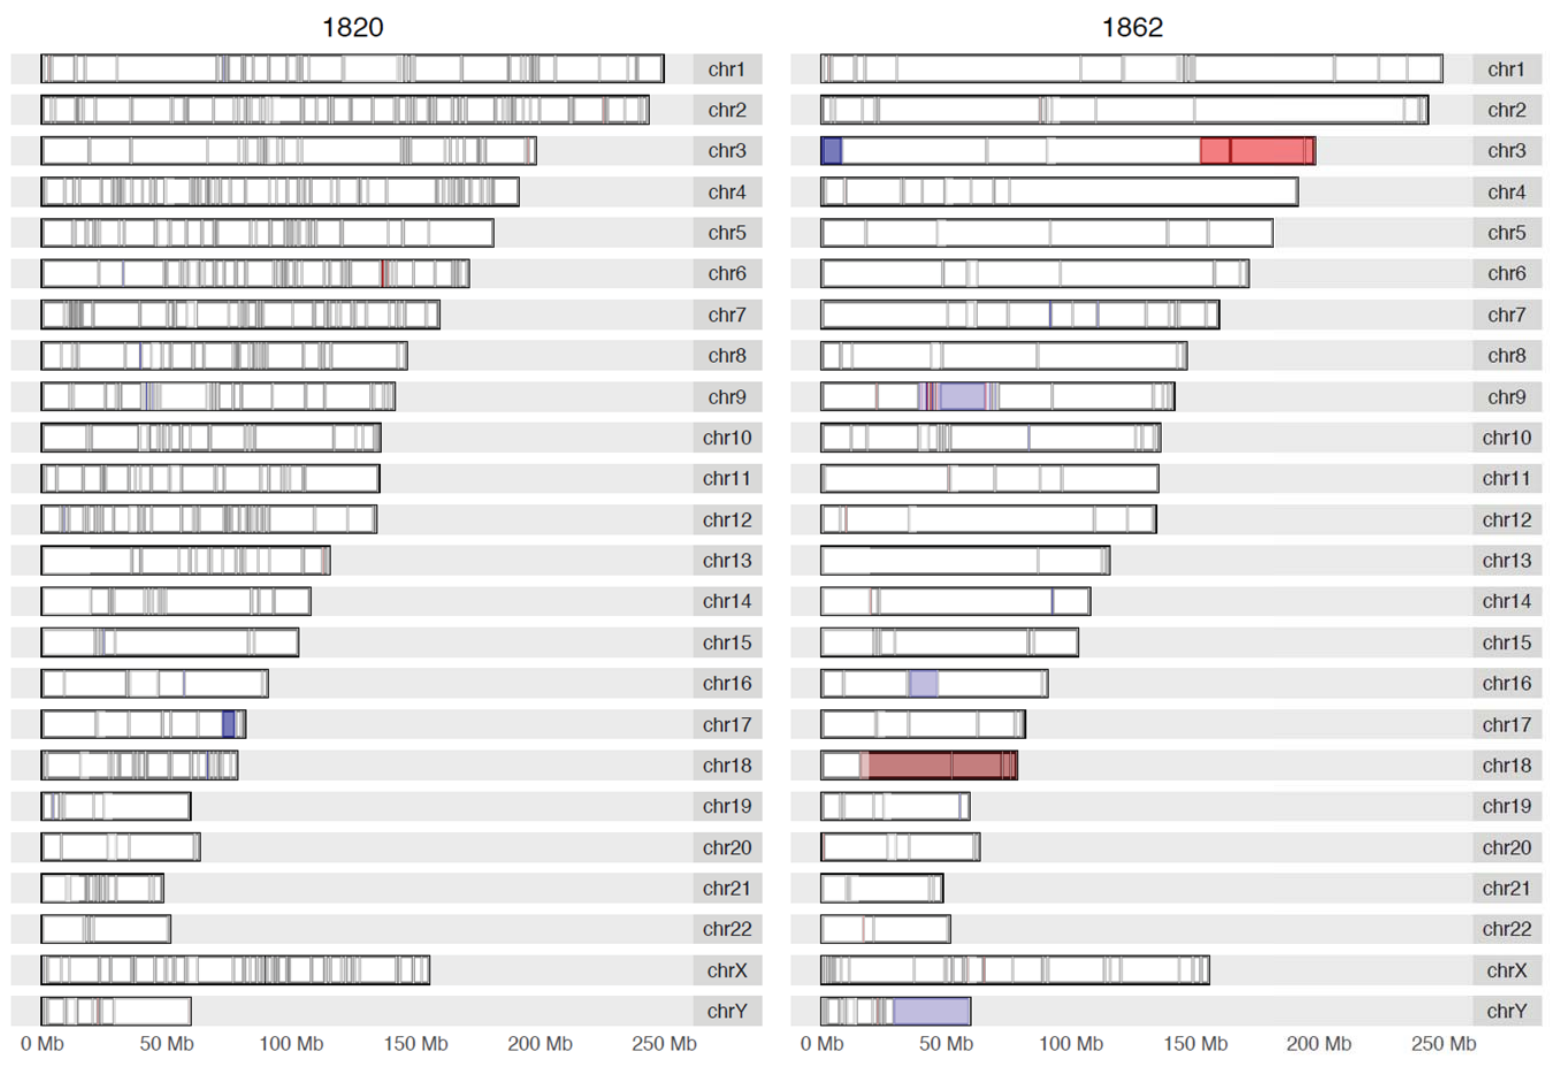

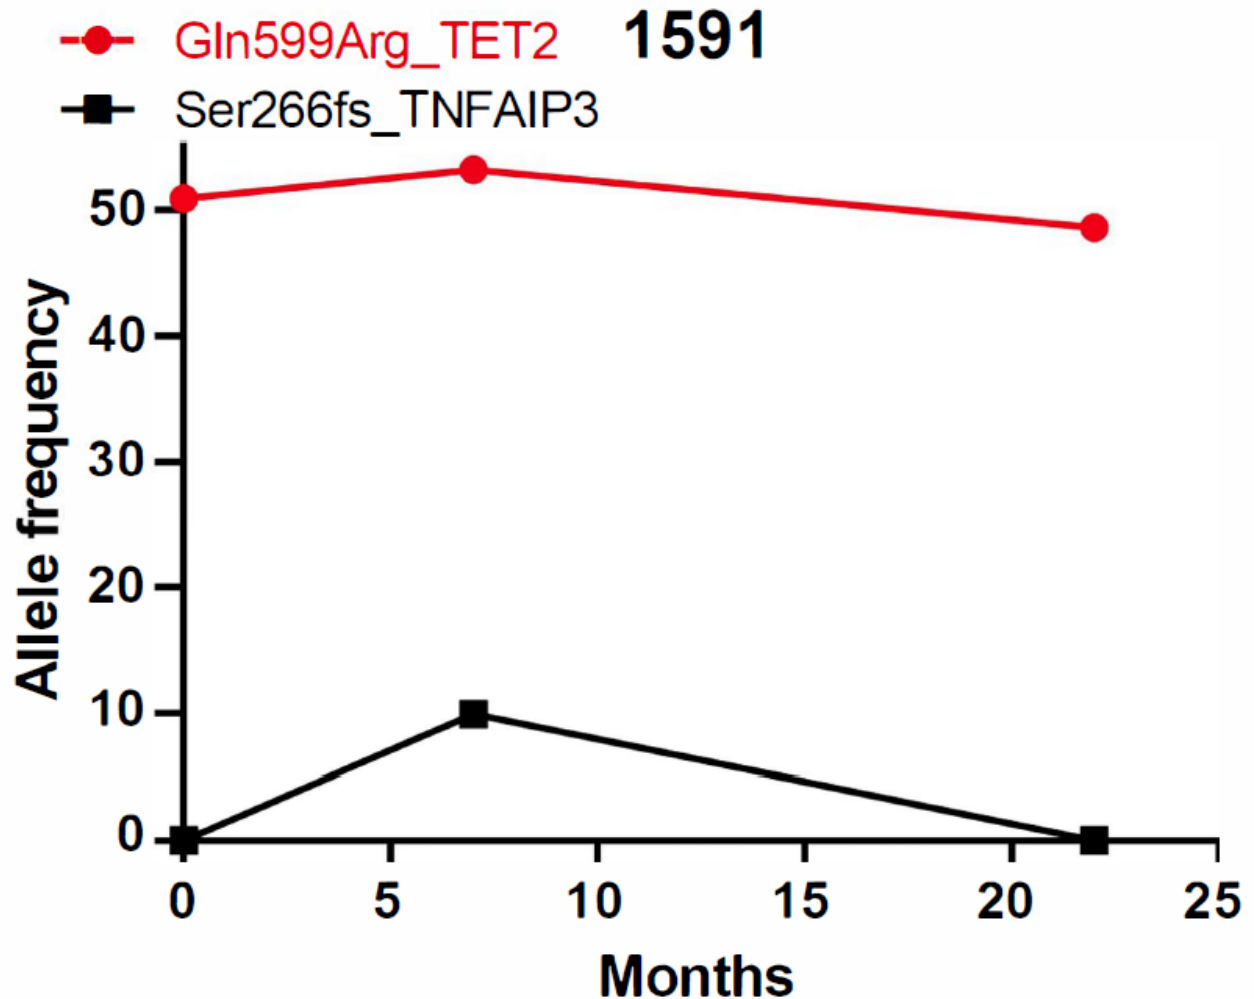

### Supplemental Figure 3: Suspected Non-Somatic SNP in *TET2*.

Patient 1591 saw no change in mutation frequency for *TET2*Gln599Arg in a 22- month monitoring period. This mutation has been previously associated with myeloproliferative neoplasms<sup>7</sup>, but was suspiciously stable at an allele frequency near 50%. The Exome Aggregation Consortium (ExAC)<sup>8</sup> notes this allele to be present in 0.006 of persons of East Asian descent, which is the self-reported ethnicity of this patient. For this reason we did not include this variant in our list of *TET2* somatic mutations and note the earlier study<sup>7</sup> was in a Korean population. The somatic nature of this variant in myeloid neoplasms may be doubtful as opposed to the others listed there.

**Supplemental Figure 4. TET2 promoter methylation specific assay.** All available DNA samples from each mutation group was assayed for methylation of the TET2 promoter. U and M are primer sets to amplify unmethylated (U) and methylated (M) TET2 promoter region. Samples with NK nomenclature are normal donors; mutant groups are marked. Two failed samples in Gel 4 (2099 and 2104) were omitted.

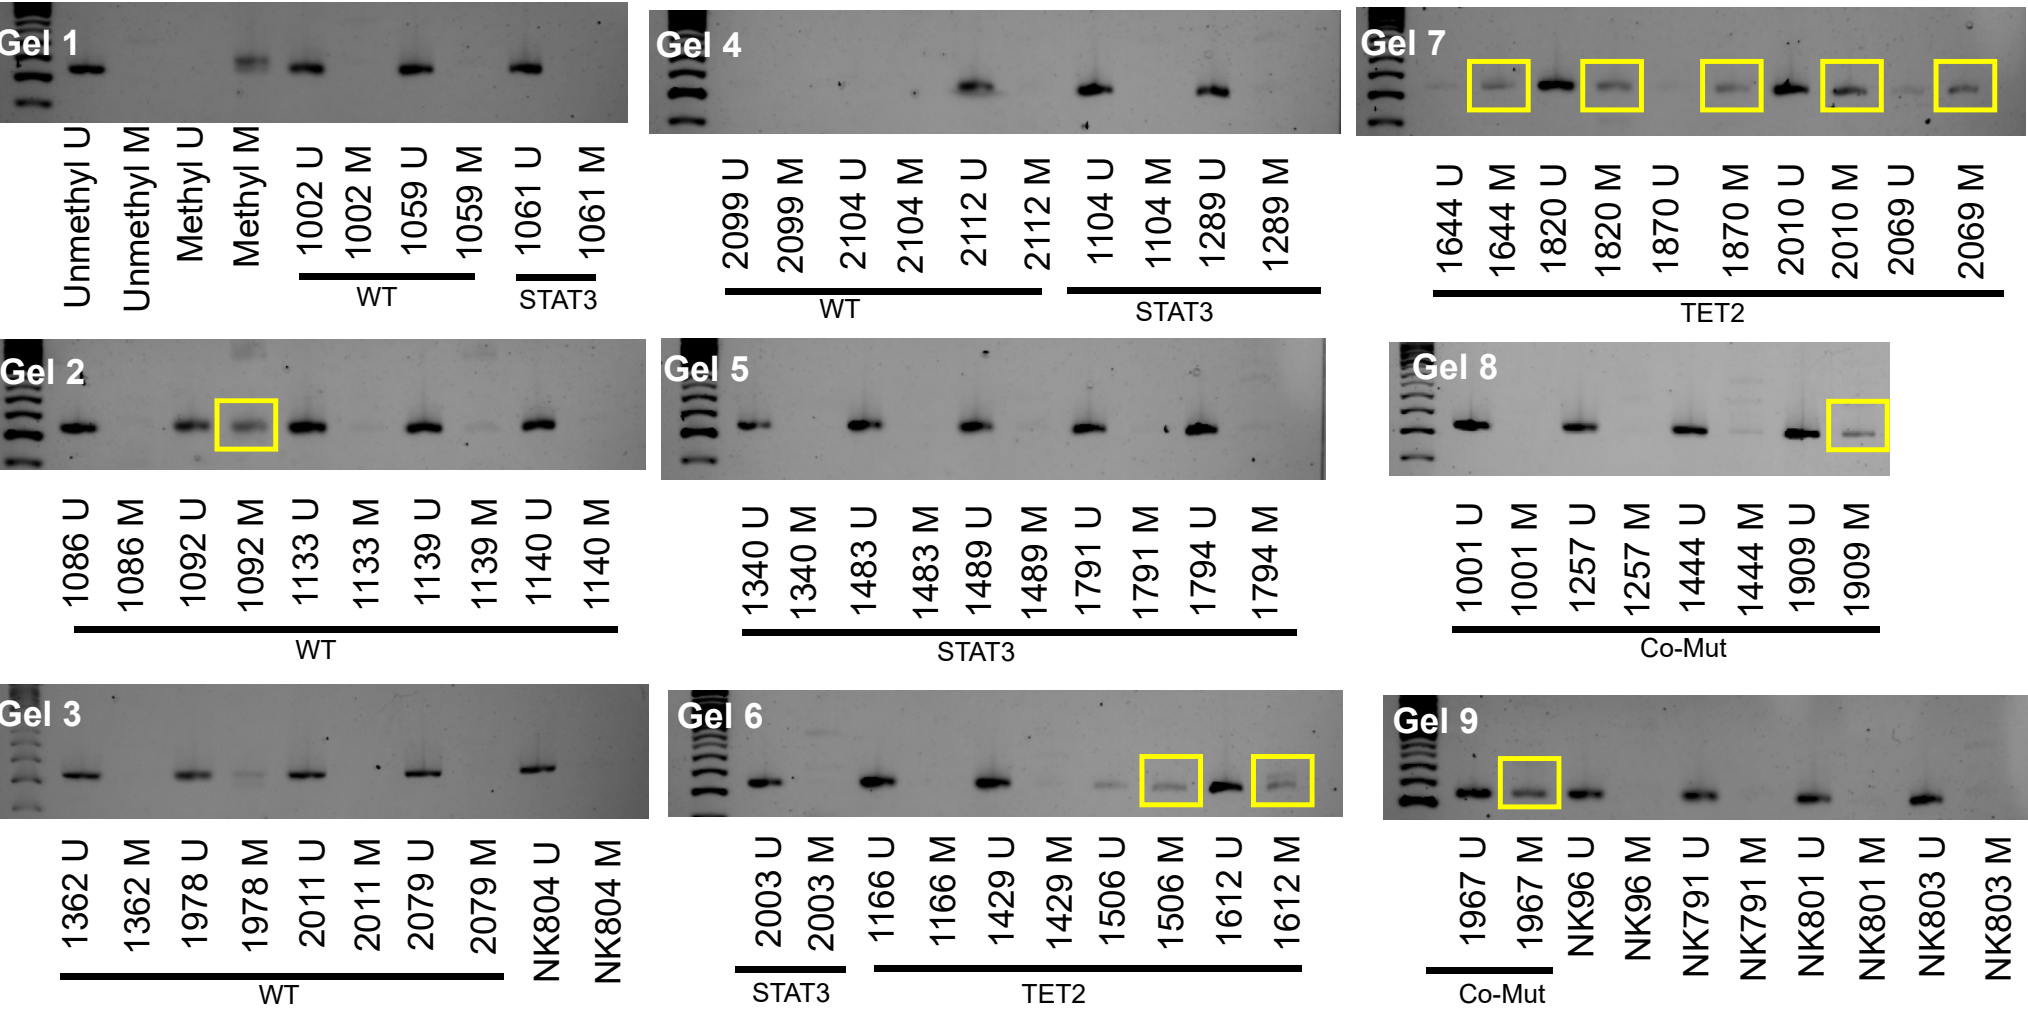

# Supplemental Figure 5. Promoter methylation of STAT3 negative regulators.

Fractional methylation at individual CpGs in promoters, where 1=100% methylation. NA=insufficient coverage to call in that sample: PTPRD promoter 1 (A), PTPRD promoter 2 (B), PTPRN promoter (C).

**A**

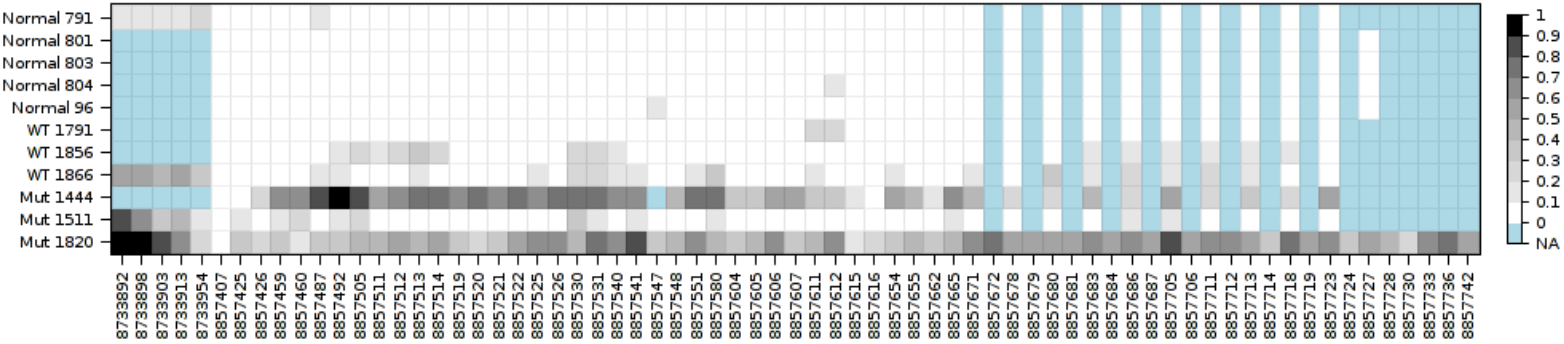

**B**

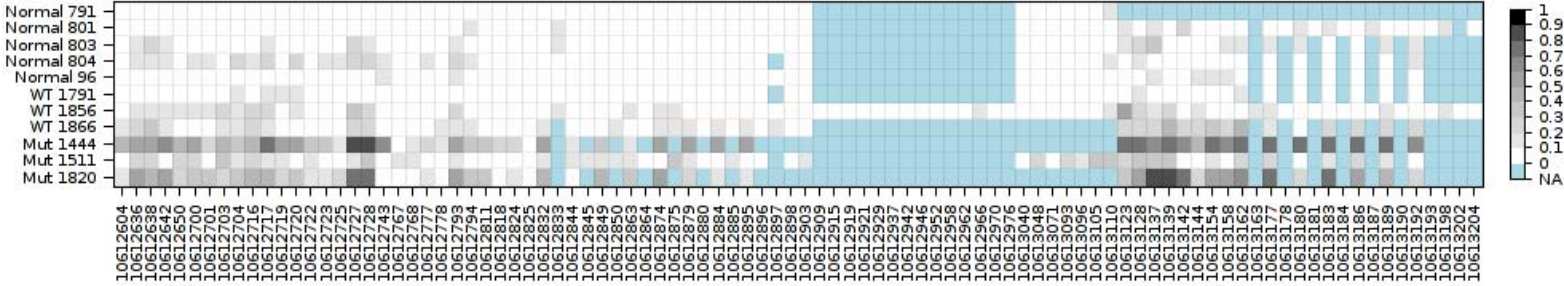

**C**

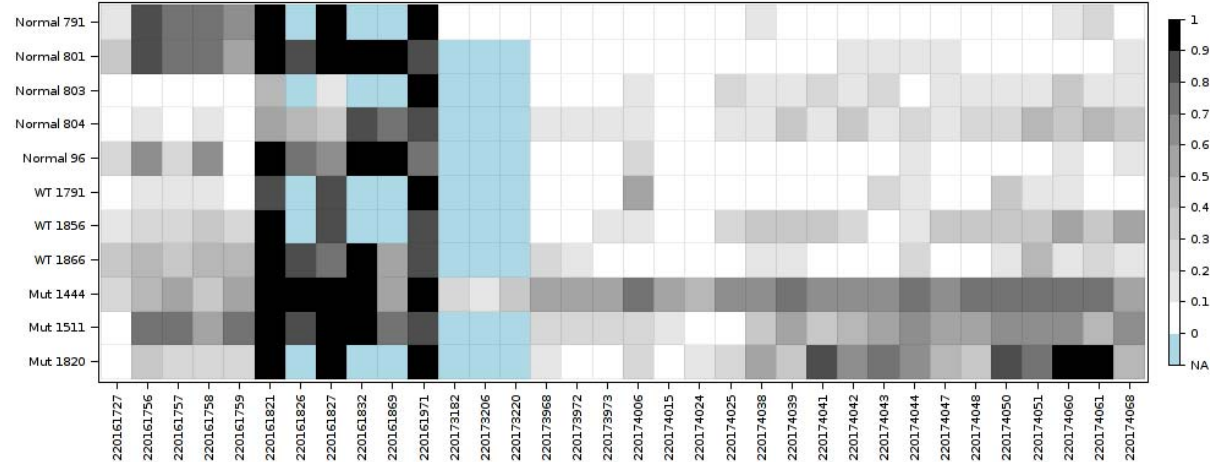

**Supplemental Figure 6. PTPRD promoter methylation specific assay.** All available DNA samples from each mutation group was assayed for methylation of the PTPRD promoter. U and M are primer sets to amplify unmethylated (U) and methylated (M) PTPRD promoter region. Samples with NK nomenclature are normal donors; mutant groups are marked. Samples 1444 and 1820, clear positives, are the same as those in the RRBS data in Supplemental Figure 5.

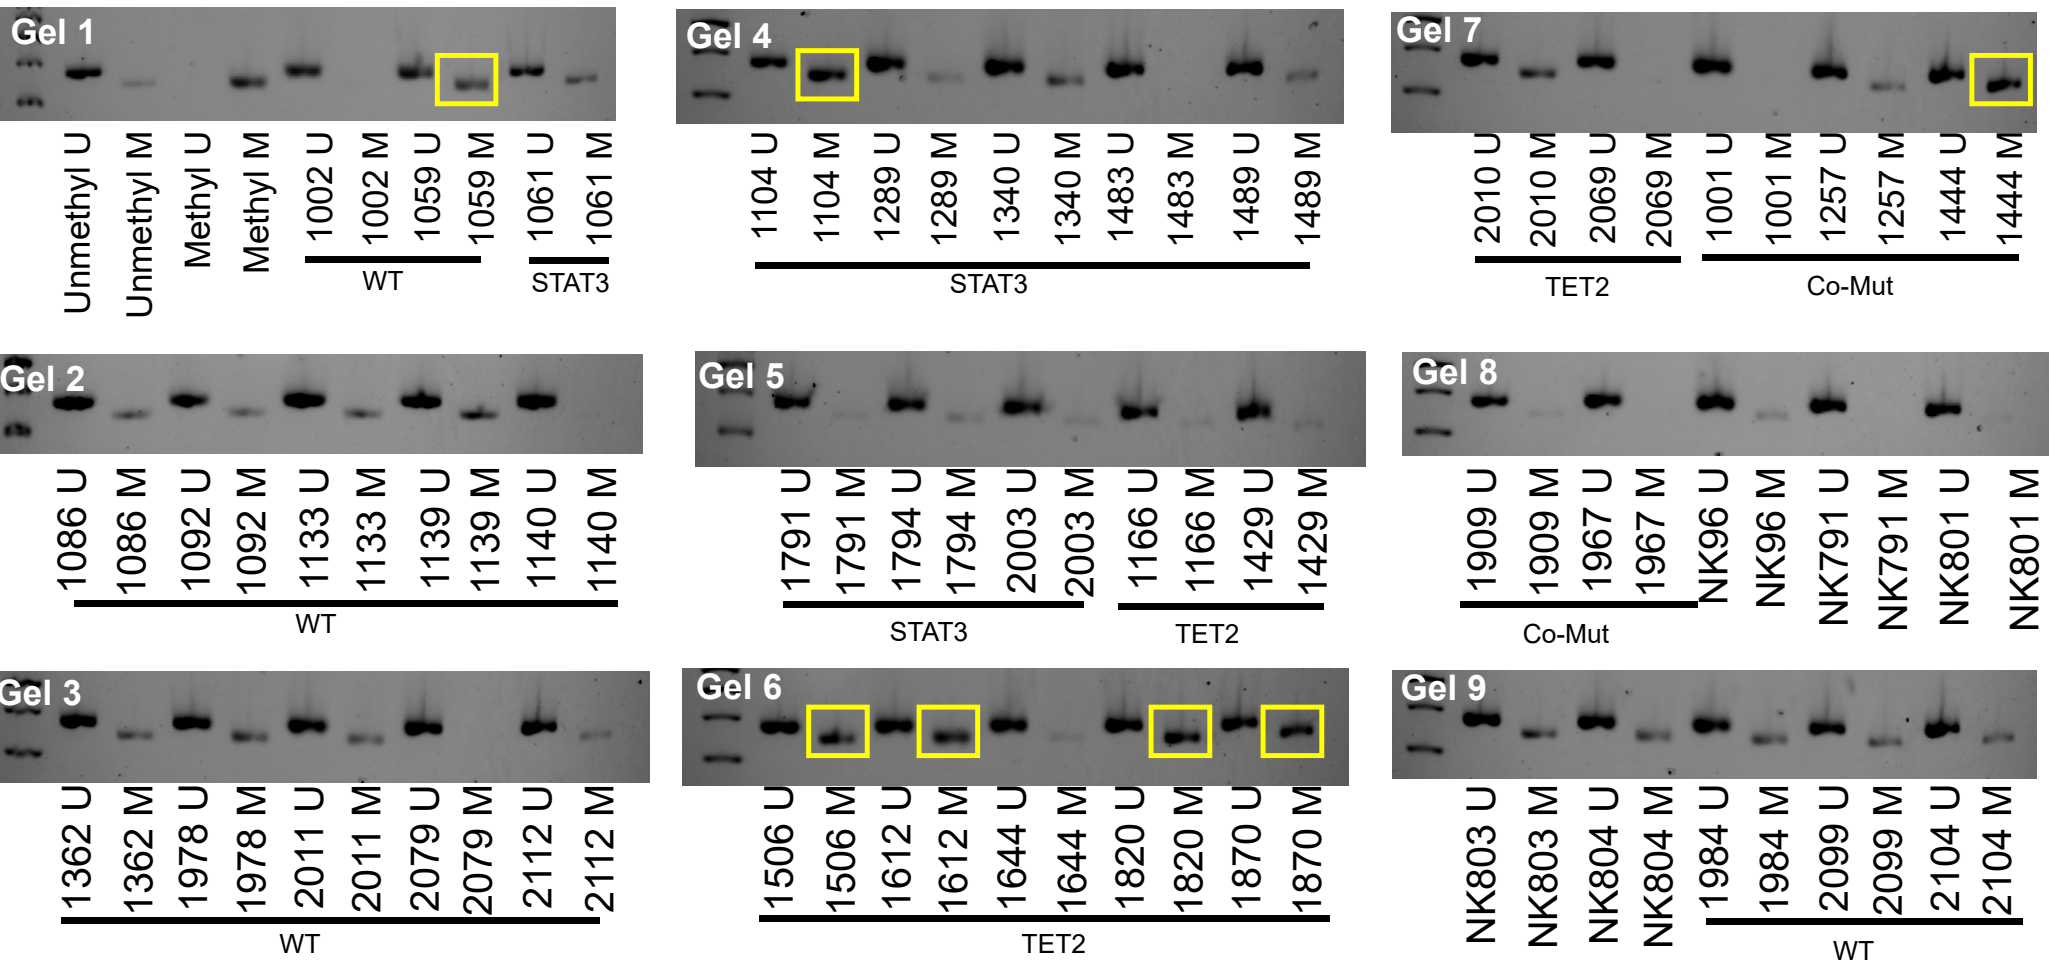



# Supplemental Figure 7: CBC Parameters Stratified by STAT3 or TET2-only mutation.

CBC parameters were plotted, showing median and 25% and 75% quartiles. **A.** Samples were analyzed as WT vs. STAT3, where WT includes the TET2-only mutation group. Welch's T-test showed RBC, HGB, HCT, RDW, and ANC were significantly different in the WT group compared to STAT3 mutant. These significant parameters are presented in Figure 6 of the main text; they are also presented here to contrast with the non-significant comparisons. **B.** Samples were analyzed as WT vs. TET2, where WT includes the STAT3-only mutation group. Welch's T-test did not show any statistically significant comparisons.

## A. STAT3-only mutation stratification

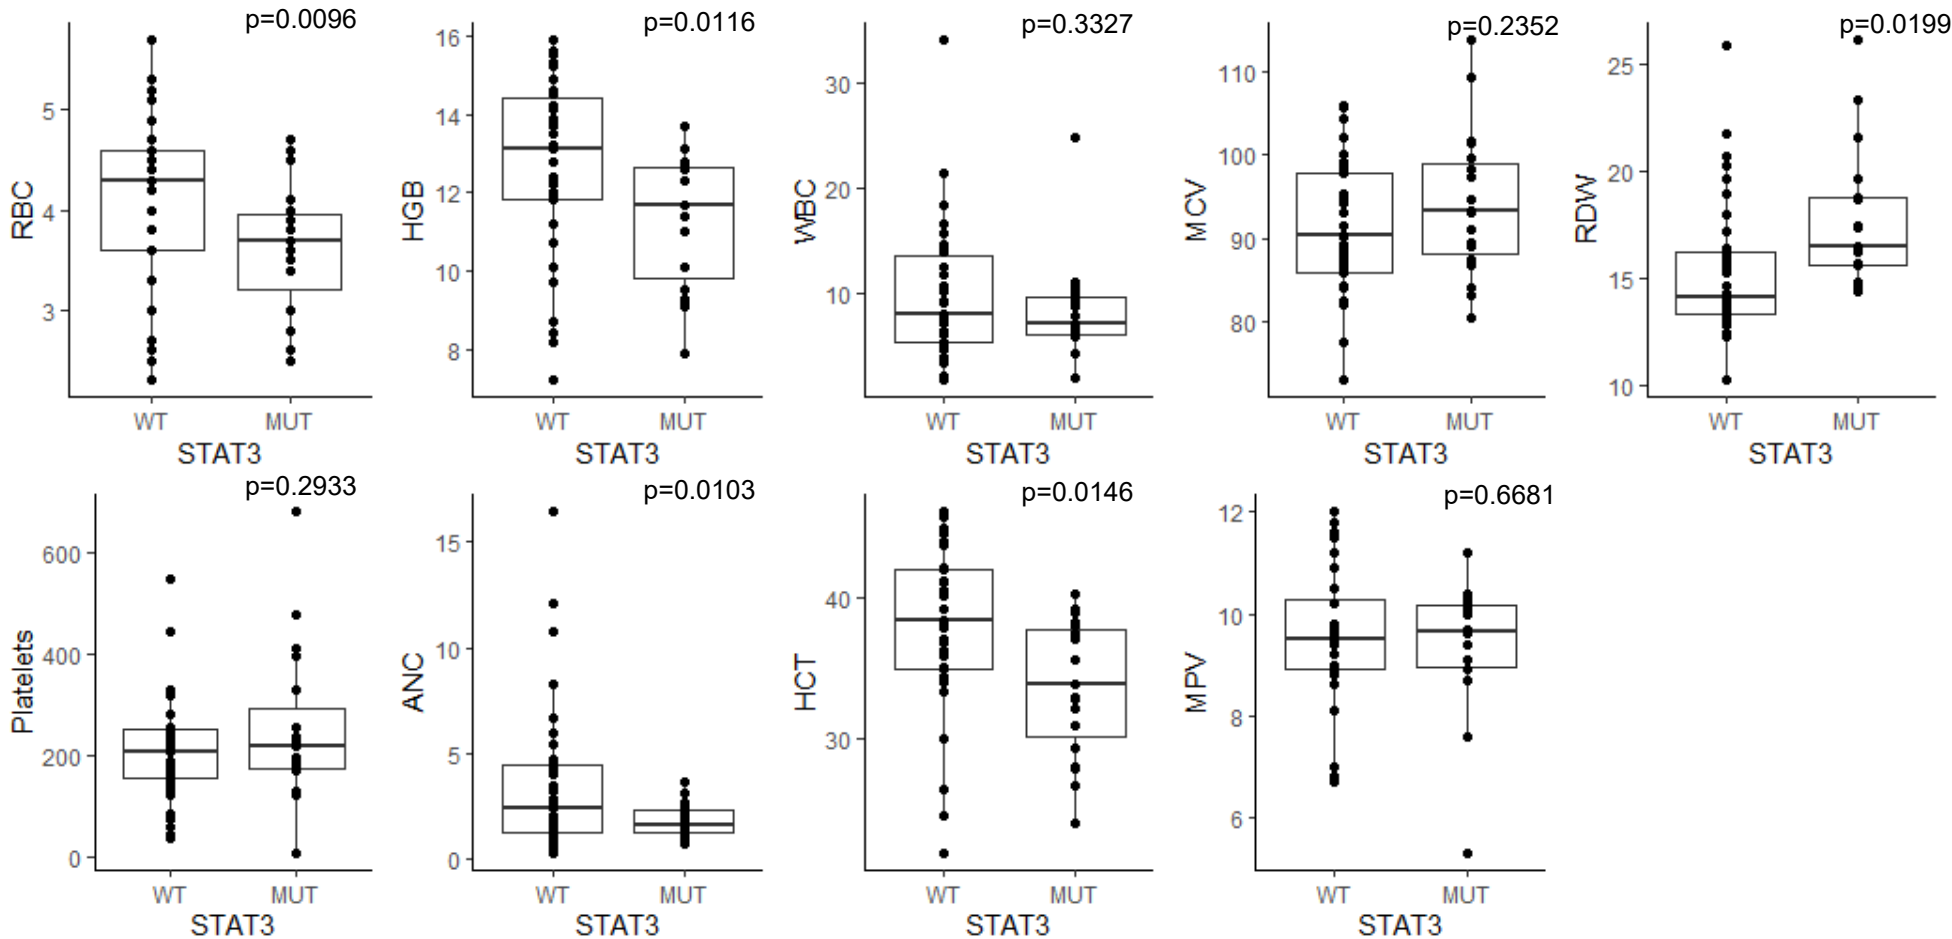

## B. TET2-only mutation stratification

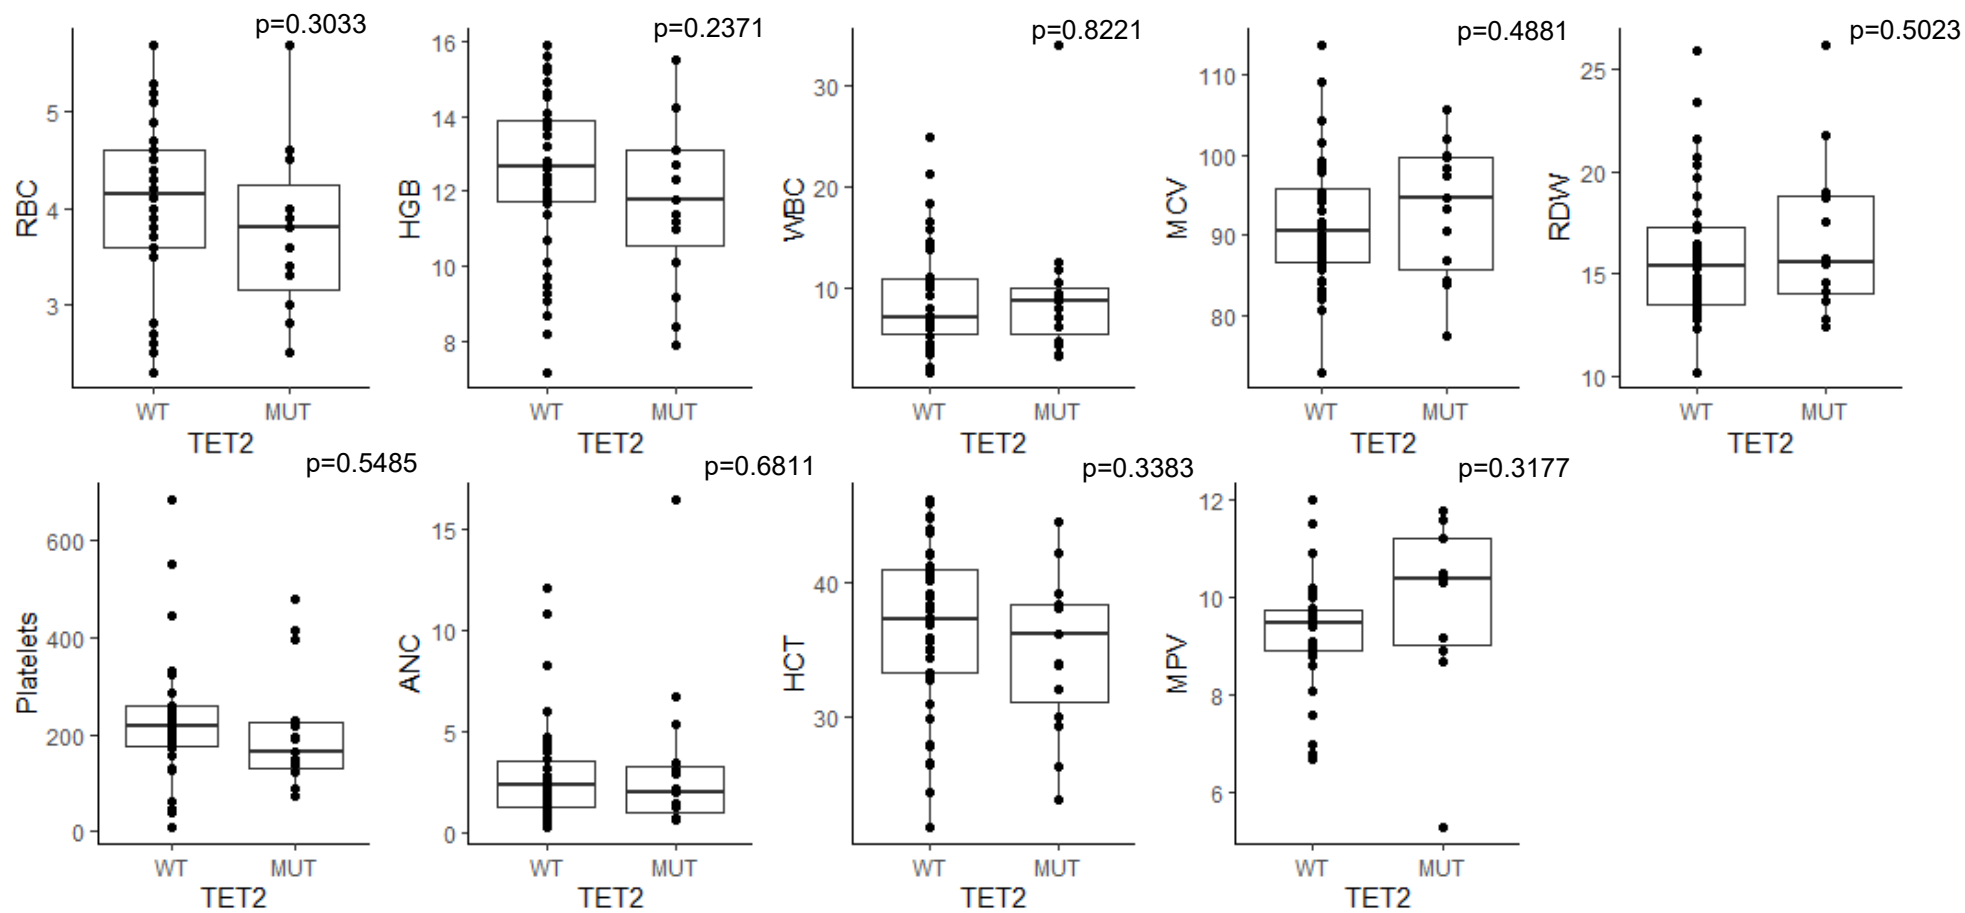

# Supplemental Figure 8. CBC Parameters Stratified by Mutation Status.

CBC parameters were plotted, showing median and 25% and 75% quartiles. Data are represented as four mutation groups: WT (no STAT3 or TET2 mutation), STAT3-only, TET2-only, or co-mutation (STAT3+TET2). Welch's ANOVA showed a significant difference in platelets (global  $p=0.0071$ ) with Games-Howell post-hoc pairwise comparison significance between WT and TET2-only mutation group ( $p=0.0074$ ). This significant parameter is presented in Figure 7A of the main text; it is also presented here to contrast with the non-significant comparisons.

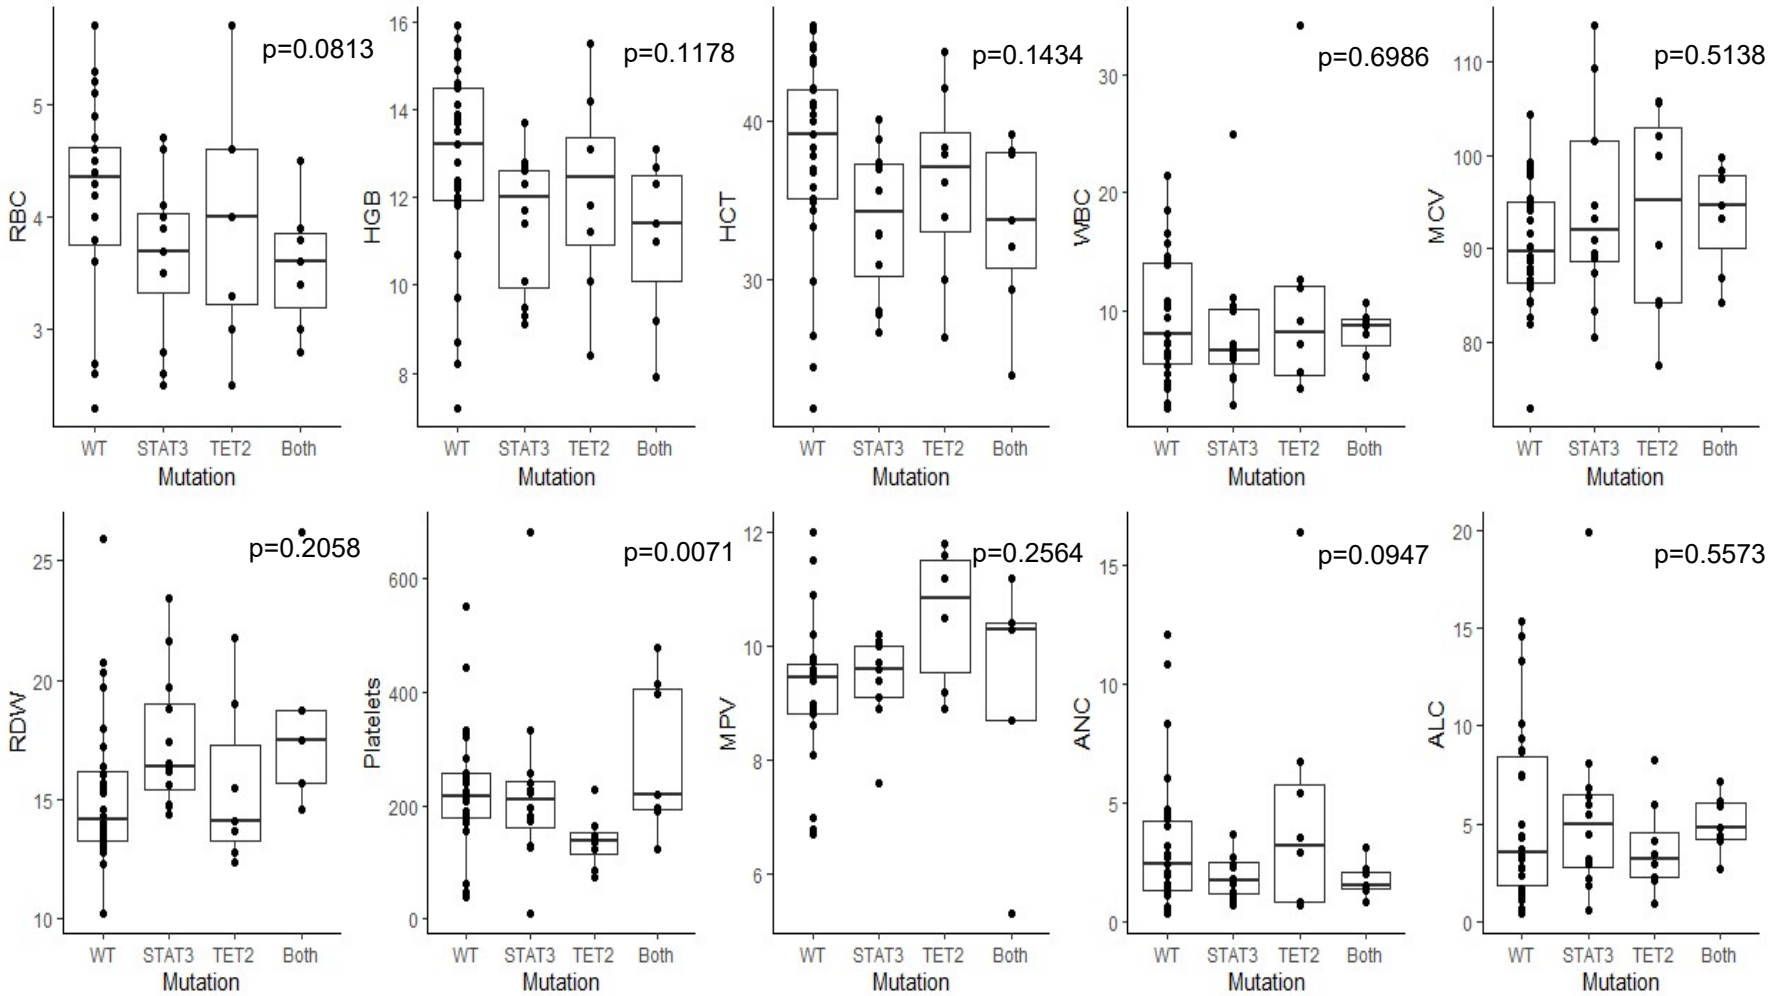

# Supplemental Figure 9: Parameters from no treatment-only CBCs stratified by mutation groups.

CBC parameters were plotted, showing median and 25% and 75% quartiles. All data plotted here are derived from a no-treatment CBC. Although grouped by mutation, sequencing for some may not have been near CBC data collection, thus we cannot ensure mutations were present for those samples. **A.** Samples were analyzed as WT vs. STAT3, where WT includes the TET2-only mutation group. Welch's t-test showed ANC and RDW were significantly different in the WT group. **B.** Samples were analyzed as WT vs. TET2, where WT includes the STAT3-only mutation group. Welch's t-test showed no significant difference with the WT group. **C.** The data were grouped as WT, STAT3 only, TET2 only, or co-mutation (STAT3 and TET2). Welch's ANOVA showed MPV was statistically significant.

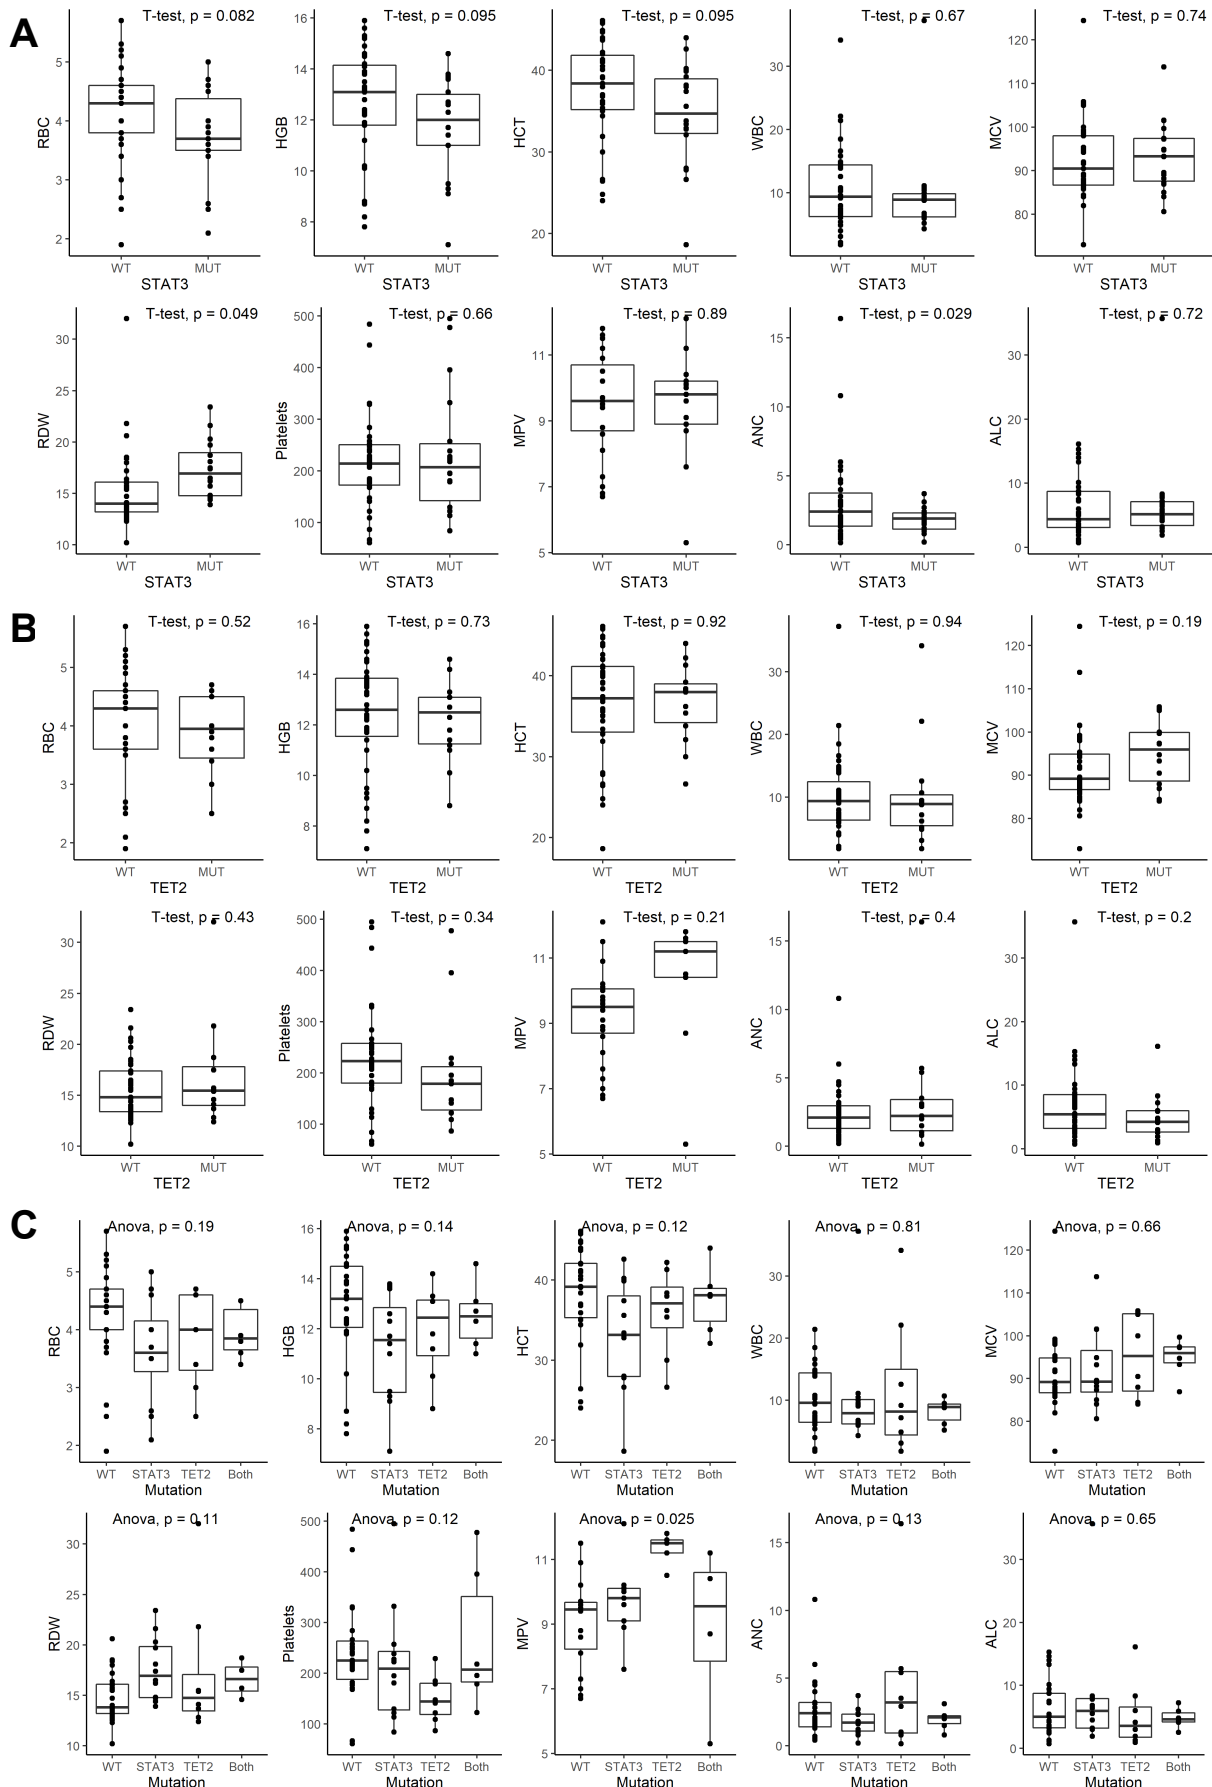

**Supplemental Tables 5, 6, and 7** are a separate Excel file (*DMR supplemental tables*) and contain DMR, hypermethylation pathway, and hypomethylation pathway data.

## Supplemental References

1. Krueger F, Andrews SR. Bismark: a flexible aligner and methylation caller for Bisulfite-Seq applications. *Bioinformatics*. 2011;27(11):1571-1572.
2. Akalin A, Kormaksson M, Li S, et al. methylKit: a comprehensive R package for the analysis of genome-wide DNA methylation profiles. *Genome Biol*. 2012;13(10):R87.
3. Li S, Garrett-Bakelman FE, Akalin A, et al. An optimized algorithm for detecting and annotating regional differential methylation. *BMC Bioinformatics*. 2013;14 Suppl 5:S10.
4. McLean CY, Bristor D, Hiller M, et al. GREAT improves functional interpretation of cis-regulatory regions. *Nat Biotechnol*. 2010;28(5):495-501.
5. Mallona I, Diez-Villanueva A, Peinado MA. Methylation plotter: a web tool for dynamic visualization of DNA methylation data. *Source Code Biol Med*. 2014;9:11.
6. Chim CS, Wan TS, Fung TK, Wong KF. Methylation of TET2, CBL and CEBPA in Ph-negative myeloproliferative neoplasms. *J Clin Pathol*. 2010;63(10):942-946.
7. Wang D, Wang L, Zhou J, et al. Reduced expression of PTPRD correlates with poor prognosis in gastric adenocarcinoma. *PLoS One*. 2014;9(11):e113754.
8. Rajala HL, Eldfors S, Kuusanmaki H, et al. Discovery of somatic STAT5b mutations in large granular lymphocytic leukemia. *Blood*. 2013;121(22):4541-4550.
9. Papaemmanuil E, Cazzola M, Boultwood J, et al. Somatic SF3B1 mutation in myelodysplasia with ring sideroblasts. *N Engl J Med*. 2011;365(15):1384-1395.
10. Bejar R, Stevenson K, Abdel-Wahab O, et al. Clinical effect of point mutations in myelodysplastic syndromes. *N Engl J Med*. 2011;364(26):2496-2506.
11. Ha JS, Jeon DS, Kim JR, Ryoo NH, Suh JS. Analysis of the Ten-Eleven Translocation 2 (TET2) gene mutation in myeloproliferative neoplasms. *Ann Clin Lab Sci*. 2014;44(2):173-179.
12. Lek M, Karczewski KJ, Minikel EV, et al. Analysis of protein-coding genetic variation in 60,706 humans. *Nature*. 2016;536(7616):285-291.
